# Supplementary material for: Characteristics and Expression Pattern of MYC Genes in Triticum aestivum, Oryza sativa, and Brachypodium distachyon
Source: MDPI journal article supplement (doi:10.3390/plants8080274), 2019-08-08
Supplement: s1 [file s1]

Page 10 of 10

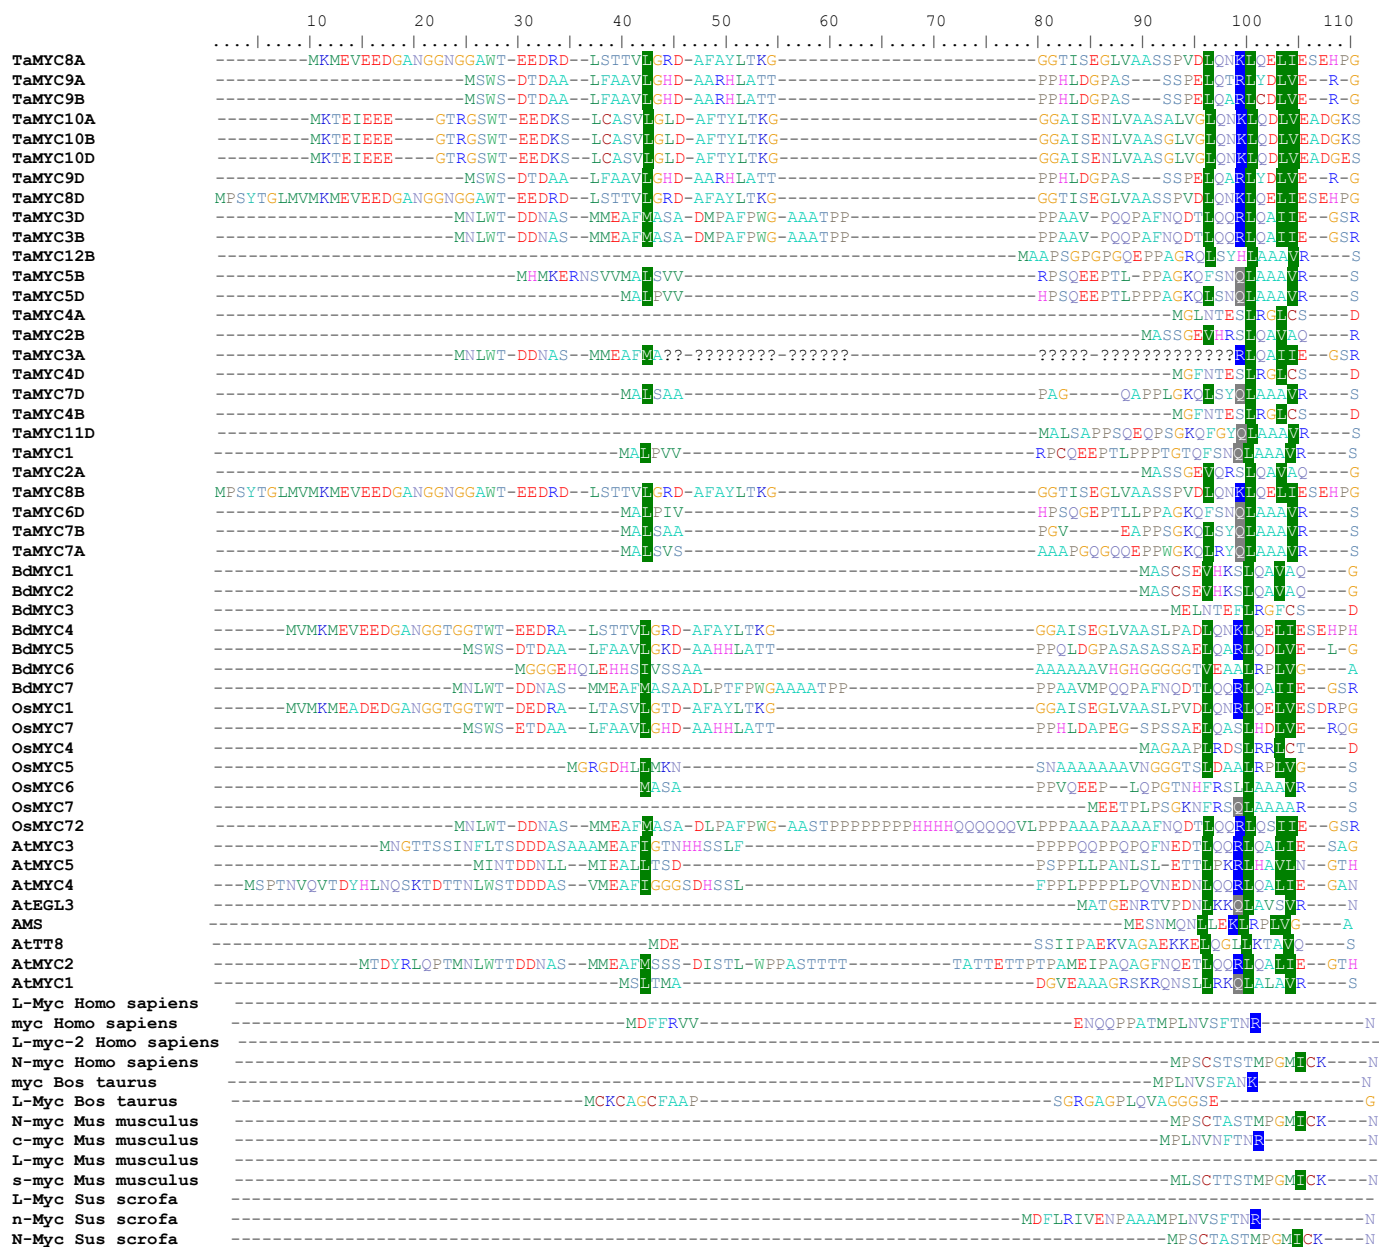

# JID

|                      | 120               | 130  | 140 | 150             | 160    | 170              | 180 | 190             | 200  | 210 | 220  |
|----------------------|-------------------|------|-----|-----------------|--------|------------------|-----|-----------------|------|-----|------|
| TaMYC8A              | AGNNVAIFWOLSRTK   | S    |     | DLVLGWDGS       | CREPND | AEALAAASA        |     | GNDDAQRMKRV     | LR   | LR  | LR   |
| TaMYC9A              | GAMTYGIIWQESRAG   | AC   |     | VLGWDGH         | CRDGP  | AEQ              |     | AGTDRSLARKRA    | LR   | LR  | LR   |
| TaMYC9B              | GAMTYGIIWQESRAG   | AC   |     | GRVLGWDGH       | CRDGP  | AEQ              |     | ARVTDRLSLARKRA  | LR   | LR  | LR   |
| TaMYC10A             | LRNNVAIFWOLSHTK   | SC   |     | ELVLGWDGS       | CREPHD | NEMNSTTRGDIHD    |     | ASSLSQQRMRKRV   | LR   | LR  | LR   |
| TaMYC10B             | LRNNVAIFWOLSHTK   | SC   |     | ELVLGWDGS       | CREPHD | NEMNSTTRGDIHD    |     | ASSLSQQRMRKRV   | LR   | LR  | LR   |
| TaMYC10D             | LRNNVAIFWOLSHTK   | SC   |     | ELVLGWDGS       | CREPHD | NEMNSTTRGDIHD    |     | ASSLSQQRMRKRV   | LR   | LR  | LR   |
| TaMYC9D              | GAMTYGIIWQESR     | AC   |     | AVLWGDGH        | CRDGP  | AEQ              |     | AGAADRLSLARKRA  | LR   | LR  | LR   |
| TaMYC8D              | AGNNVAIFWOLSRTK   | SC   |     | DLVLGWDGS       | CREPND | AEALAAASA        |     | GNDDAQRMKRV     | LR   | LR  | LR   |
| TaMYC3D              | ETWTVAIFWQSSDA    | C    |     | ASLLGWDGV       | YKCCDD | ADKRRQQPT        |     | PASAAEQEHKRV    | LR   | LR  | LR   |
| TaMYC3B              | ETWTVAIFWQSSDA    | C    |     | ASLLGWDGV       | YKCCDD | ADKRRQQPT        |     | PASAAEQEHKRV    | LR   | LR  | LR   |
| TaMYC12B             | INNTVAIFWQSSISGP  | AC   |     | VLWKKDF         | YNGEIK | TRKM             |     | TSSITTTT        | ERS  | QCL | REL  |
| TaMYC5B              | TNWSVAIFWQSSISR   | PC   |     | VLWKKDF         | YNGEIK | TRKVTSSAD        |     | LSADQLVLQR      | SE   | QCL | REL  |
| TaMYC5D              | INNTVAIFWQSSISR   | PC   |     | VLWKKDF         | YNGEIK | TRKVTSSAD        |     | LTADQLVLQR      | SE   | QCL | REL  |
| TaMYC4A              | RLMKVAIFWQSSISSEK | HC   |     | ILTWEDGV        | VD     | KMTKNTRDHYGGP    |     | ADGDNQIIT       | FTSN | DGG | QOSY |
| TaMYC2B              | LRNTVAIFWQSSISSEK | HC   |     | ALVWEGDH        | YNGEIK | TRKVTQPAVAQAQAPA |     | PAEAAADQARSR    | ROL  | KE  | ESL  |
| TaMYC3A              | ETWTVAIFWQSSDA    | C    |     | ASLLGWDGV       | YKCCDD | ADKRRQQPT        |     | PASAAEQEHKRV    | LR   | LR  | LR   |
| TaMYC4D              | GLMKVAIFWQSSISSEK | HC   |     | ILTWEDGV        | VD     | KMTKNTRDHYGGP    |     | ADGDNQIIT       | FTSN | DGG | QOSY |
| TaMYC7D              | INNTVAIFWQSSISGL  | RPPC |     | VLWKKDF         | YNGEIK | TRKVTSSAD        |     | VTANDLILQR      | SE   | QCL | REL  |
| TaMYC4B              | GLMKVAIFWQSSISSEK | HC   |     | ILTWEDGV        | VD     | KMTKNTRDHYGGP    |     | ADGDNQIIT       | FTSN | DGG | QOSY |
| TaMYC11D             | INNTVAIFWQSSISGL  | RPPC |     | VLWKKDF         | YNGEIK | TRKVTSSAD        |     | VTANDLILQR      | SE   | QCL | REL  |
| TaMYC1               | INNTVAIFWQSSISR   | PC   |     | VLWKKDF         | YNGEIK | TRKVTSSAD        |     | ITADQLVLQR      | SE   | QCL | REL  |
| TaMYC2A              | LRNTVAIFWQSSISSEK | HC   |     | ALVWEGDH        | YNGEIK | TRKVTQPAVAQAQAPA |     | PAEAAADQARSR    | ROL  | KE  | ESL  |
| TaMYC8B              | AGNNVAIFWOLSRTK   | SC   |     | DLVLGWDGS       | CREPND | AEALAAASA        |     | GNDDAQRMKRV     | LR   | LR  | LR   |
| TaMYC6D              | INNTVAIFWQSSISR   | PC   |     | VLWKKDF         | YNGEIK | TRKVTSSAD        |     | LTADQLVLQR      | SE   | QCL | REL  |
| TaMYC7B              | INNTVAIFWQSSISGL  | RPPC |     | VLWKKDF         | YNGEIK | TRKVTSSAD        |     | VTANDLILQR      | SE   | QCL | REL  |
| TaMYC7A              | INNTVAIFWQSSISGP  | PPAC |     | VLWKKDF         | YNGEIK | TRKVTSSAD        |     | PTADNLVLQR      | SE   | QCL | REL  |
| BdMYC1               | LRNTVAIFWQSSISSEK | HC   |     | ALVWEGDH        | YNGEIK | TRKVTQPAVAQAQAPA |     | PAEAAADQARSR    | ROL  | KE  | ESL  |
| BdMYC2               | LRNTVAIFWQSSISSEK | HC   |     | ALVWEGDH        | YNGEIK | TRKVTQPAVAQAQAPA |     | PAEAAADQARSR    | ROL  | KE  | ESL  |
| BdMYC3               | GLMKVAIFWQSSISSEK | HC   |     | ILTWEDGV        | VD     | KMTKNTRDHYGGP    |     | ADGDNQIIT       | FTSN | DGG | QOSY |
| BdMYC4               | GGNNVAIFWQSSISR   | PC   |     | VLWKKDF         | YNGEIK | TRKVTSSAD        |     | LTADQLVLQR      | SE   | QCL | REL  |
| BdMYC5               | GAMTYGIIWQESRAG   | AC   |     | AVLWGDGH        | CRDGP  | AEQ              |     | AGAADRLSLARKRA  | LR   | LR  | LR   |
| BdMYC6               | DGMDVCIWQLSPDQ    |      |     | RFLDM           | TECCS  | EF               |     | SELEA           | QV   | SA  | LD   |
| BdMYC7               | ETWTVAIFWQSSDA    | GAC  |     | ASLLGWDGV       | YKCCDD | ADKRRQQPT        |     | PASAAEQEHKRV    | LR   | LR  | LR   |
| OsMYC1               | AGNNVAIFWOLSRTK   | SC   |     | DLVLGWDGS       | CREPHD | GEAGPAASA        |     | GSDEAKQRMKRV    | LR   | LR  | LR   |
| OsMYC7               | GAMTYGIIWQESRAG   | GAAS |     | RAARAVLWGDGH    | CRDGA  | GHGE             |     | VGAERSVABKRV    | LR   | LR  | LR   |
| OsMYC4               | VGWSVAIFWQSSISR   | PC   |     | VLWKKDF         | YNGEIK | TRKVTSSAD        |     | LTADQLVLQR      | SE   | QCL | REL  |
| OsMYC5               | DGMDVCIWQLSPDQ    |      |     | RFLDM           | TECCS  | EF               |     | SELEA           | QV   | SA  | LD   |
| OsMYC6               | ISWSVAIFWQSSISR   | PC   |     | VLWKKDF         | YNGEIK | TRKVTSSAD        |     | LTADQLVLQR      | SE   | QCL | REL  |
| OsMYC7               | INNTVAIFWQSSISR   | PC   |     | VLWKKDF         | YNGEIK | TRKVTSSAD        |     | LTADQLVLQR      | SE   | QCL | REL  |
| OsMYC72              | ETWTVAIFWQSSDA    | STC  |     | ASLLGWDGV       | YKCCDD | ADKRRQQPT        |     | PASAAEQEHKRV    | LR   | LR  | LR   |
| AtMYC3               | ENMTVAIFWQSSISR   | DSST |     | ENMTVAIFWQSSISR | DSST   |                  |     | ENMTVAIFWQSSISR | DSST |     |      |
| AtMYC5               | EPWSVAIFWQSSISR   | FSC  |     | EPWSVAIFWQSSISR | FSC    |                  |     | EPWSVAIFWQSSISR | FSC  |     |      |
| AtMYC4               | ENMTVAIFWQSSISR   | DSST |     | ENMTVAIFWQSSISR | DSST   |                  |     | ENMTVAIFWQSSISR | DSST |     |      |
| AtEGL3               | IQWSVAIFWQSSISR   | PC   |     | IQWSVAIFWQSSISR | PC     |                  |     | IQWSVAIFWQSSISR | PC   |     |      |
| AMS                  | RAMDVCIWQLSPDQ    |      |     | RFLDM           | TECCS  | EF               |     | SELEA           | QV   | SA  | LD   |
| AtTT8                | VDNTVAIFWQSSISR   | PC   |     | VDNTVAIFWQSSISR | PC     |                  |     | VDNTVAIFWQSSISR | PC   |     |      |
| AtMYC2               | EGMTVAIFWQSSISR   | PC   |     | EGMTVAIFWQSSISR | PC     |                  |     | EGMTVAIFWQSSISR | PC   |     |      |
| AtMYC1               | VQWSVAIFWQSSISR   | PC   |     | VQWSVAIFWQSSISR | PC     |                  |     | VQWSVAIFWQSSISR | PC   |     |      |
| L-Myc Homo sapiens   | --MDRDSVQHYFYDY   |      |     | --MDRDSVQHYFYDY |        |                  |     | --MDRDSVQHYFYDY |      |     |      |
| myc Homo sapiens     | YDLDDSVQPYFYCD    |      |     | YDLDDSVQPYFYCD  |        |                  |     | YDLDDSVQPYFYCD  |      |     |      |
| L-myc-2 Homo sapiens | --MDRDSVQHYFYDY   |      |     | --MDRDSVQHYFYDY |        |                  |     | --MDRDSVQHYFYDY |      |     |      |
| N-myc Homo sapiens   | PDLEDSLQPCFYPD    |      |     | PDLEDSLQPCFYPD  |        |                  |     | PDLEDSLQPCFYPD  |      |     |      |
| myc Bos taurus       | YDLDDSVQPYFYCD    |      |     | YDLDDSVQPYFYCD  |        |                  |     | YDLDDSVQPYFYCD  |      |     |      |
| L-Myc Bos taurus     | ADMDDSVQHYFYDY    |      |     | ADMDDSVQHYFYDY  |        |                  |     | ADMDDSVQHYFYDY  |      |     |      |
| N-myc Mus musculus   | PDLEDSLQPCFYPD    |      |     | PDLEDSLQPCFYPD  |        |                  |     | PDLEDSLQPCFYPD  |      |     |      |
| c-myc Mus musculus   | YDLDDSVQPYFYCD    |      |     | YDLDDSVQPYFYCD  |        |                  |     | YDLDDSVQPYFYCD  |      |     |      |
| L-myc Mus musculus   | --MDRDSVQHYFYDY   |      |     | --MDRDSVQHYFYDY |        |                  |     | --MDRDSVQHYFYDY |      |     |      |
| s-myc Mus musculus   | SDLEDDSLKPCFYFE   |      |     | SDLEDDSLKPCFYFE |        |                  |     | SDLEDDSLKPCFYFE |      |     |      |
| L-Myc Sus scrofa     | --MDRDSVQHYFYDY   |      |     | --MDRDSVQHYFYDY |        |                  |     | --MDRDSVQHYFYDY |      |     |      |
| n-Myc Sus scrofa     | YDLDDSVQPYFYCD    |      |     | YDLDDSVQPYFYCD  |        |                  |     | YDLDDSVQPYFYCD  |      |     |      |
| N-Myc Sus scrofa     | PDLEDSLQPCFYPD    |      |     | PDLEDSLQPCFYPD  |        |                  |     | PDLEDSLQPCFYPD  |      |     |      |

|                      | 230                   | 240                                  | 250                                              | 260                                  | 270 | 280 | 290 | 300 | 310                         | 320                      | 330    |
|----------------------|-----------------------|--------------------------------------|--------------------------------------------------|--------------------------------------|-----|-----|-----|-----|-----------------------------|--------------------------|--------|
| TaMYC8A              | GGADEE                | DYAPTIGQ                             | VTDIEWFELVSMYFAAPRRAGGPGQVFAAGLPH-VV             |                                      |     |     |     |     | PNSERNVFP                   | ANNVYRGYLAQSAQLR         |        |
| TaMYC9A              | GDEDGA                | DYALRLDR                             | VTVGEMVFLASMYFAAPRRAGGPGQVFAAGLPH-VV             |                                      |     |     |     |     | AVDPHLPAA                   | PGWYVRASLAQSAQLR         |        |
| TaMYC9B              | GDDDDG                | DYALRLDR                             | VTVGEMVFLASMYFAAPRRAGGPGQVFAAGLPH-VV             |                                      |     |     |     |     | VDPHLPASAAA                 | PGWYVRASLAQSAQLR         |        |
| TaMYC10A             | AGADEE                | DDALRIDQ                             | VTDIEWFELVSMYFAAPRRAGGPGQVFAAGLPH-VV             |                                      |     |     |     |     | PNNPHKVSP                   | SNYCVRGFLASAAQGR         |        |
| TaMYC10B             | AGAEDE                | DDALRIDQ                             | VTDIEWFELVSMYFAAPRRAGGPGQVFAAGLPH-VV             |                                      |     |     |     |     | PNNPHKVSP                   | SNYCVRGFLASAAQGR         |        |
| TaMYC10D             | AGADEE                | DDALRIDQ                             | VTDIEWFELVSMYFAAPRRAGGPGQVFAAGLPH-VV             |                                      |     |     |     |     | PNNPHKVSP                   | SNYCVRGFLASAAQGR         |        |
| TaMYC9D              | GDEDGA                | DYALRLDR                             | VTVGEMVFLASMYFAAPRRAGGPGQVFAAGLPH-VV             |                                      |     |     |     |     | AVDPHLPAS                   | PGWYVRASLAQSAQLR         |        |
| TaMYC8D              | DYAPTIGQ              | VTDIEWFELVSMYFAAPRRAGGPGQVFAAGLPH-VV |                                                  |                                      |     |     |     |     | PNSERNVFP                   | ANNVYRGYLAQSAQLR         |        |
| TaMYC3D              | AGGAAAE               | DEAVEEE                              | VTDIEWFELVSMYFAAPRRAGGPGQVFAAGLPH-VV             |                                      |     |     |     |     | ATGLA                       | SAPCEARARQAYTFGLR        |        |
| TaMYC3B              | AGGAAAE               | DEAVEEE                              | VTDIEWFELVSMYFAAPRRAGGPGQVFAAGLPH-VV             |                                      |     |     |     |     | ATGLA                       | SAPCEARARQAYTFGLR        |        |
| TaMYC12B             | LS                    | GGNSDR                               | RARLSPED                                         | LGDAEWYFLVSMYFAAPRRAGGPGQVFAAGLPH-VV |     |     |     |     | YNAQAD                      | TKTFQRALLAKTASQ          |        |
| TaMYC5B              | LSGQCD                | HRARRR                               | AAALSPED                                         | LGDAEWYFLVSMYFAAPRRAGGPGQVFAAGLPH-VV |     |     |     |     | CNAQCAD                     | TKTFQRALLAKTASQ          |        |
| TaMYC5D              | LSGQCD                | HRARRR                               | AAALSPED                                         | LGDAEWYFLVSMYFAAPRRAGGPGQVFAAGLPH-VV |     |     |     |     | CNAQCAD                     | TKTFQRALLAKTASQ          |        |
| TaMYC4A              |                       |                                      | P                                                | FCPTAALRMSHSMVSLGEBIIKKVAIMQHC-WI    |     |     |     |     | SSS                         | DLRSTLVVKKYHEDWQFOFAAQIK |        |
| TaMYC2B              | DVHGCA                | QEARRR                               | SAALAPED                                         | LGDAEWYFLVSMYFAAPRRAGGPGQVFAAGLPH-VV |     |     |     |     | SRANEVD                     | SKVFSRAILAKSASQ          |        |
| TaMYC3A              | AG                    | GGAAG                                | DEAVEEE                                          | VTDIEWFELVSMYFAAPRRAGGPGQVFAAGLPH-VV |     |     |     |     | ATGLA                       | SAPCEARARQAYTFGLR        |        |
| TaMYC4D              |                       |                                      | P                                                | FCPTAALRMSHSMVSLGEBIIKKVAIMQHC-WI    |     |     |     |     | SSS                         | DLRSTLVVKKYHEDWQFOFAAQIK |        |
| TaMYC7D              | LSGKAD                | HRGRRR                               | AAALSPED                                         | LGDAEWYFLVSMYFAAPRRAGGPGQVFAAGLPH-VV |     |     |     |     | YNAQAD                      | TKTFQRALLAKTASQ          |        |
| TaMYC4B              |                       |                                      | P                                                | FCPTAALRMSHSMVSLGEBIIKKVAIMQHC-WI    |     |     |     |     | SSS                         | DLRSTLVVKKYHEDWQFOFAAQIK |        |
| TaMYC11D             | LPGNSN                | NRARRR                               | AAALSPED                                         | LGDAEWYFLVSMYFAAPRRAGGPGQVFAAGLPH-VV |     |     |     |     | YNAQAD                      | TKTFQRALLAKTASQ          |        |
| TaMYC1               | LSGQCD                | HRARRR                               | AAALSPED                                         | LGDAEWYFLVSMYFAAPRRAGGPGQVFAAGLPH-VV |     |     |     |     | CNAQCAD                     | TKTFQRALLAKTASQ          |        |
| TaMYC2A              | DVHGCA                | QEARRR                               | SAALAPED                                         | LGDAEWYFLVSMYFAAPRRAGGPGQVFAAGLPH-VV |     |     |     |     | SRANEVD                     | SKVFSRAILAKSASQ          |        |
| TaMYC8B              | GGADEE                | DYAPTIGQ                             | VTDIEWFELVSMYFAAPRRAGGPGQVFAAGLPH-VV             |                                      |     |     |     |     | PNSERNVFP                   | ANNVYRGYLAQSAQLR         |        |
| TaMYC6D              | LSGQCD                | HRARRR                               | AAALSPED                                         | LGDAEWYFLVSMYFAAPRRAGGPGQVFAAGLPH-VV |     |     |     |     | CNAQCAD                     | TKTFQRALLAKTASQ          |        |
| TaMYC7B              | LSGKAD                | HRARRR                               | AAALSPED                                         | LGDAEWYFLVSMYFAAPRRAGGPGQVFAAGLPH-VV |     |     |     |     | YNAQAD                      | TKTFQRALLAKTASQ          |        |
| TaMYC7A              | SGGNSD                | RRARRR                               | AAALSPED                                         | LGDAEWYFLVSMYFAAPRRAGGPGQVFAAGLPH-VV |     |     |     |     | CNAQCAD                     | TKTFQRALLAKTASQ          |        |
| BdMYC1               | TGCRAEAVQ             | EASARRR                              | TAALAPED                                         | LGDAEWYFLVSMYFAAPRRAGGPGQVFAAGLPH-VV |     |     |     |     | CRANEVD                     | SKVFSRAILAKSASQ          |        |
| BdMYC2               | DAVQAE                | SAARRR                               | TAALAPED                                         | LGDAEWYFLVSMYFAAPRRAGGPGQVFAAGLPH-VV |     |     |     |     | CRANEVD                     | SKVFSRAILAKSASQ          |        |
| BdMYC3               |                       |                                      | P                                                | FCPTAALRMSHSMVSLGEBIIKKVAIMQHC-WI    |     |     |     |     | SAND                        | FRSTLMYKYHEDWQFOFAAQIK   |        |
| BdMYC4               |                       | GGADEE                               | DYAPTIGQ                                         | VTDIEWFELVSMYFAAPRRAGGPGQVFAAGLPH-VV |     |     |     |     | PNTDRNVFP                   | VNVCYRGYLAQSAQLR         |        |
| BdMYC5               |                       | GGEDEE                               | DYALRLDR                                         | VTVGEMVFLASMYFAAPRRAGGPGQVFAAGLPH-VV |     |     |     |     | AVDDPRR                     | PGWYVRASLAQSAQLR         |        |
| BdMYC6               |                       |                                      | PLD                                              |                                      |     |     |     |     | SSSI                        | MMHACALLNQPI-WI          |        |
| BdMYC7               | AG                    | GGAAG                                | DEAVEEE                                          | VTDIEWFELVSMYFAAPRRAGGPGQVFAAGLPH-VV |     |     |     |     | ASGLA                       | SAPCEARARQAYTFGLR        |        |
| OsMYC1               | GGVDEE                | DYAPTIGQ                             | VTDIEWFELVSMYFAAPRRAGGPGQVFAAGLPH-VV             |                                      |     |     |     |     | PNTDRNVFP                   | VNVCYRGYLAQSAQLR         |        |
| OsMYC7               | GG                    | GDEDGA                               | DYALRLDR                                         | VTVGEMVFLASMYFAAPRRAGGPGQVFAAGLPH-VV |     |     |     |     | DVDPHPSGSGSAP               | PGWYVRASLAQSAQLR         |        |
| OsMYC4               | GTGRGG                | GGGEGH                               | AADGAAGHSHDRVDAVHKAMAQQVHVHVEVIAQALSLHR-WI       |                                      |     |     |     |     | VHDIVDECEE                  | DLVLEMKQFOFAAQIK         |        |
| OsMYC5               |                       |                                      | PLD                                              |                                      |     |     |     |     | SSSEEE                      | EAD                      | GGGAK  |
| OsMYC6               | LSGEC                 | HRARRR                               | AAALSPED                                         | LGDAEWYFLVSMYFAAPRRAGGPGQVFAAGLPH-VV |     |     |     |     | RNAQAD                      | SKTFQRALLAKTASQ          |        |
| OsMYC7               | LSGEC                 | HRARRR                               | AAALSPED                                         | LGDAEWYFLVSMYFAAPRRAGGPGQVFAAGLPH-VV |     |     |     |     | TNAQAD                      | RKLFHRAILAKSASQ          |        |
| OsMYC72              | A                     | GAGAG                                | DEAVEEE                                          | VTDIEWFELVSMYFAAPRRAGGPGQVFAAGLPH-VV |     |     |     |     | ATGLS                       | SAPCEARARQAYTFGLR        |        |
| AtMYC3               | SGGIGV                | SDESNDDE                             | VTDIEWFELVSMYFAAPRRAGGPGQVFAAGLPH-VV             |                                      |     |     |     |     | SGSGALT                     | GSGCEARARQAYTFGLR        |        |
| AtMYC5               |                       | SGEAFV                               | VEDDVSDDDDVEVTDIEWFELVSMYFAAPRRAGGPGQVFAAGLPH-VV |                                      |     |     |     |     | TGSDLIY                     | GSGCEARARQAYTFGLR        |        |
| AtMYC4               |                       | SGGVGG                               | GDEAGDEE                                         | VTDIEWFELVSMYFAAPRRAGGPGQVFAAGLPH-VV |     |     |     |     | SGSNALA                     | GSGCEARARQAYTFGLR        |        |
| AtEGL3               | ASGSSQ                | VTRRAS                               | AAALSPED                                         | LGDAEWYFLVSMYFAAPRRAGGPGQVFAAGLPH-VV |     |     |     |     | CNAETAD                     | SKVFSRAILAKSASQ          |        |
| AMS                  |                       |                                      |                                                  | PRTKSCFELSLPASIPLDSTVAFELLNQTC-WI    |     |     |     |     |                             | SSSEES                   | FWETIC |
| AtTT8                | LAGE                  | TSEARA                               | CTALSPED                                         | LGDAEWYFLVSMYFAAPRRAGGPGQVFAAGLPH-VV |     |     |     |     | SCANEVD                     | SKVFSRAILAKSASQ          |        |
| AtMYC2               |                       | SGGVAE                               | SDDAVDEE                                         | VTDIEWFELVSMYFAAPRRAGGPGQVFAAGLPH-VV |     |     |     |     | SGSDQLS                     | GSGCEARARQAYTFGLR        |        |
| AtMYC1               | TVSTTHDNLNDDDDNCHSTSM | SPDD                                 | LSDEWYFLVSMYFAAPRRAGGPGQVFAAGLPH-VV              |                                      |     |     |     |     | CNAQYAE                     | NKLFHRAILAKSASQ          |        |
| L-Myc Homo sapiens   |                       | PSPPTS                               | PWGLGPGA                                         | CDPAPGLPPEEPFGGCTG-DEABSRHSGKMG      |     |     |     |     | RNYASII                     | PRDCMWSGFSAREKLE         |        |
| myc Homo sapiens     |                       |                                      | TPPLSPSR-RSGLCSPSVAVTETSLRGDNDGGGCSSTADOLEMVT    |                                      |     |     |     |     | TELLGGDMVNQSFICDPDDETFIKNII | PRDCMWSGFSAREKLE         |        |
| L-myc-2 Homo sapiens |                       |                                      | PWGLGPGA                                         | GNPALSFGLEFPVFCAGDETESQDYWKA-WI      |     |     |     |     | ANYASLI                     | PRDCMWSGFSAREKLE         |        |
| N-myc Homo sapiens   |                       |                                      | TPPLSPSR-RSGLCSPSVAVTETSLRGDNDGGGCSSTADOLEMVT    |                                      |     |     |     |     | TELLGGDMVNQSFICDPDDETFIKNII | PRDCMWSGFSAREKLE         |        |
| myc Bos taurus       |                       |                                      | TPPLSPSR-RSGLCSPSVAVTETSLRGDNDGGGCSSTADOLEMVT    |                                      |     |     |     |     | TELLGGDMVNQSFICDPDDETFIKNII | PRDCMWSGFSAREKLE         |        |
| L-Myc Bos taurus     |                       |                                      | PWGLGPGA                                         | GNPALSFGLEFPVFCAGDETESQDYWKA-WI      |     |     |     |     | ANYASLI                     | PRDCMWSGFSAREKLE         |        |
| N-myc Mus musculus   |                       |                                      | TPPLSPSR-RSGLCSPSVAVTETSLRGDNDGGGCSSTADOLEMVT    |                                      |     |     |     |     | TELLGGDMVNQSFICDPDDETFIKNII | PRDCMWSGFSAREKLE         |        |
| c-myc Mus musculus   |                       |                                      | TPPLSPSR-RSGLCSPSVAVTETSLRGDNDGGGCSSTADOLEMVT    |                                      |     |     |     |     | TELLGGDMVNQSFICDPDDETFIKNII | PRDCMWSGFSAREKLE         |        |
| L-myc Mus musculus   |                       |                                      | PWGLGPGA                                         | GNPALSFGLEFPVFCAGDETESQDYWKA-WI      |     |     |     |     | ANYASLI                     | PRDCMWSGFSAREKLE         |        |
| s-myc Mus musculus   |                       |                                      | TPPLSPSR-RSGLCSPSVAVTETSLRGDNDGGGCSSTADOLEMVT    |                                      |     |     |     |     | TELLGGDMVNQSFICDPDDETFIKNII | PRDCMWSGFSAREKLE         |        |
| L-Myc Sus scrofa     |                       |                                      | PWGLGPGA                                         | GNPALSFGLEFPVFCAGDETESQDYWKA-WI      |     |     |     |     | ANYASII                     | PRDCMWSGFSAREKLE         |        |
| n-Myc Sus scrofa     |                       |                                      | TPPLSPSR-RSGLCSPSVAVTETSLRGDNDGGGCSSTADOLEMVT    |                                      |     |     |     |     | TELLGGDMVNQSFICDPDDETFIKNII | PRDCMWSGFSAREKLE         |        |
| N-Myc Sus scrofa     |                       |                                      | TPPLSPSR-RSGLCSPSVAVTETSLRGDNDGGGCSSTADOLEMVT    |                                      |     |     |     |     | TELLGGDMVNQSFICDPDDETFIKNII | PRDCMWSGFSAREKLE         |        |

\_\_\_\_\_

[illegible]

|                      | 450                                                                           | 460 | 470 | 480 | 490 | 500 | 510 | 520         | 530                 | 540   | 550              |    |
|----------------------|-------------------------------------------------------------------------------|-----|-----|-----|-----|-----|-----|-------------|---------------------|-------|------------------|----|
| TaMYC8A              | IER                                                                           |     |     |     |     |     |     |             |                     |       | SPGLAKIF         | GK |
| TaMYC9A              | AVA                                                                           |     |     |     |     |     |     |             |                     |       | PDDRMRI          | GK |
| TaMYC9B              | AVA                                                                           |     |     |     |     |     |     |             |                     |       | PDDRMRI          | GK |
| TaMYC10A             | AQI                                                                           |     |     |     |     |     |     |             |                     |       | SPGLAKIF         | GK |
| TaMYC10B             | AQI                                                                           |     |     |     |     |     |     |             |                     |       | SPGLAKIF         | GK |
| TaMYC10D             | AQI                                                                           |     |     |     |     |     |     |             |                     |       | SPGLAKIF         | GK |
| TaMYC9D              | AVA                                                                           |     |     |     |     |     |     |             |                     |       | PDDRMRI          | GK |
| TaMYC8D              | IER                                                                           |     |     |     |     |     |     |             |                     |       | SPGLAKIF         | GK |
| TaMYC3D              | AET                                                                           |     |     |     |     |     |     |             |                     |       | DPSVLWLA         | DA |
| TaMYC3B              | AET                                                                           |     |     |     |     |     |     |             |                     |       | DPSVLWLA         | DA |
| TaMYC12B             | SLAN                                                                          |     |     |     |     |     |     |             |                     |       | DTSEAGIM         | LE |
| TaMYC5B              | SAD                                                                           |     |     |     |     |     |     |             |                     |       | DTGDADIV         | FE |
| TaMYC5D              | SAD                                                                           |     |     |     |     |     |     |             |                     |       | DTGDADIV         | FE |
| TaMYC4A              | KKPTADVSLDPADVLAHDLFDVINNSAQLFTIEHLSLPHPFTPSEFFPMLEDVITGAY                    |     |     |     |     |     |     | DIGLTTCSDES | DLWTVNEAPSELTHCKTLV |       | PEMKNLS          | FM |
| TaMYC2B              | SHI                                                                           |     |     |     |     |     |     |             |                     |       | EPNKFDE          | YE |
| TaMYC3A              | AET                                                                           |     |     |     |     |     |     |             |                     |       | DPSVLWLA         | DA |
| TaMYC4D              | KKPAADVSVDPADVLAHDLFDVINNSAQLFTIEHLSLPHPFTPSEFFPMLEDVITGAYNVGLTTCSD           |     |     |     |     |     |     | ETFDANES    | DLWTVNEAPSELTHCKTLV |       | PEMKNLS          | FM |
| TaMYC7D              | STNEIG                                                                        |     |     |     |     |     |     |             |                     |       | NGEVDIVV         | FE |
| TaMYC4B              | KKPTADISVDPADVLAHDLFDVINNSAQLFTIEHLSLPHPFTPSEFFPMLEDVITGAYDIGLTTCS            |     |     |     |     |     |     | DETFDANES   | DLWTVNEAPSELTHCKTLV |       | PEMKNLS          | FM |
| TaMYC11D             | SANDT                                                                         |     |     |     |     |     |     |             |                     |       | REATDILL         | FE |
| TaMYC1               | SVD                                                                           |     |     |     |     |     |     |             |                     |       | DTGDADIV         | FD |
| TaMYC2A              | SHIDQQSFQTRKPTTGQPKP                                                          |     |     |     |     |     |     |             |                     |       | EPNKFNE          | YE |
| TaMYC8B              | IER                                                                           |     |     |     |     |     |     |             |                     |       | SPGLAKIF         | GK |
| TaMYC6D              | SAD                                                                           |     |     |     |     |     |     |             |                     |       | DAGEADIV         | FE |
| TaMYC7B              | STNETR                                                                        |     |     |     |     |     |     |             |                     |       | RDVEITIV         | FE |
| TaMYC7A              | SLAK                                                                          |     |     |     |     |     |     |             |                     |       | RTGEADM          | FE |
| BdMYC1               | RKI                                                                           |     |     |     |     |     |     |             |                     |       | HAGQDNEM         | EH |
| BdMYC2               | RKI                                                                           |     |     |     |     |     |     |             |                     |       | HAGQDNEM         | EH |
| BdMYC3               | KKPTANVSVDPADVLAHDLFDLINSSAQLLTIDHLSIPHPLTMSEFFPMLEDVITIGA                    |     |     |     |     |     |     | CPDETFDANES | DLWTVNEVPSELTC      | SKKVV | PEMKNLS          | FM |
| BdMYC4               | IEK                                                                           |     |     |     |     |     |     |             |                     |       | SPGLAKIF         | GK |
| BdMYC5               |                                                                               |     |     |     |     |     |     |             |                     |       | PNDYMRIF         | GK |
| BdMYC6               |                                                                               |     |     |     |     |     |     |             |                     |       | GHGWQL           | QQ |
| BdMYC7               | GGDQDET                                                                       |     |     |     |     |     |     |             |                     |       | DPSVLWLA         | DA |
| OsMYC1               | TDK                                                                           |     |     |     |     |     |     |             |                     |       | SPGLAKIF         | GK |
| OsMYC7               |                                                                               |     |     |     |     |     |     |             |                     |       | PEDFMRIF         | GK |
| OsMYC4               | TSSHSEDLAGGGNTYNDDMINHQFRHCKSPASTIQSFNPVQQFYAGPTFCRPVTIASRCDLFQPDHGSTFTLNSQSE |     |     |     |     |     |     | DNSTALLKNSV | SHKTSNDAFS          | HA    | FN               |    |
| OsMYC5               |                                                                               |     |     |     |     |     |     |             |                     |       | TPSFQWDG         | GA |
| OsMYC6               | PNE                                                                           |     |     |     |     |     |     |             |                     |       | TEADADIV         | EG |
| OsMYC7               |                                                                               |     |     |     |     |     |     |             |                     |       | AGDADIVV         | FE |
| OsMYC72              |                                                                               |     |     |     |     |     |     |             |                     |       | DPSVLWLA         | DA |
| AtMYC3               | DQG                                                                           |     |     |     |     |     |     |             |                     |       | ENDPALWI         | SE |
| AtMYC5               |                                                                               |     |     |     |     |     |     |             |                     |       | SKYF             |    |
| AtMYC4               | DQG                                                                           |     |     |     |     |     |     |             |                     |       | ENDPGLWI         | SE |
| AtEGL3               | FDPLS                                                                         |     |     |     |     |     |     |             |                     |       | DDKYTFVF         | IT |
| AMS                  |                                                                               |     |     |     |     |     |     |             |                     |       | ESKPYGML         | SG |
| AtTT8                | EVHE                                                                          |     |     |     |     |     |     |             |                     |       | EADEEEV          | EE |
| AtMYC2               | DQG                                                                           |     |     |     |     |     |     |             |                     |       | ENDPSMWI         | ND |
| AtMYC1               |                                                                               |     |     |     |     |     |     |             |                     |       | ERKMEIKI         | SE |
| L-Myc Homo sapiens   |                                                                               |     |     |     |     |     |     |             |                     |       | EPKTQACS         | GS |
| myc Homo sapiens     | LND                                                                           |     |     |     |     |     |     |             |                     |       | SSSPKSCA         | SQ |
| L-myc-2 Homo sapiens |                                                                               |     |     |     |     |     |     |             |                     |       | EPKIQACS         | RS |
| N-myc Homo sapiens   | ECV                                                                           |     |     |     |     |     |     |             |                     |       | DPAVVFPFPVNKREPA |    |
| myc Bos taurus       | LND                                                                           |     |     |     |     |     |     |             |                     |       | SSSPKPCA         | SP |
| L-Myc Bos taurus     |                                                                               |     |     |     |     |     |     |             |                     |       | EPKTQACS         | GS |
| N-myc Mus musculus   | ECV                                                                           |     |     |     |     |     |     |             |                     |       | DPAVVFPFPVNKRESA |    |
| c-myc Mus musculus   | LND                                                                           |     |     |     |     |     |     |             |                     |       | SSSPKSCSSDSTAFS  |    |
| L-myc Mus musculus   |                                                                               |     |     |     |     |     |     |             |                     |       | EPKTQACS         | GS |
| s-myc Mus musculus   | ECV                                                                           |     |     |     |     |     |     |             |                     |       | DPAVVFFP         | AN |
| L-Myc Sus scrofa     |                                                                               |     |     |     |     |     |     |             |                     |       | EPKTQACS         | GS |
| n-Myc Sus scrofa     | LND                                                                           |     |     |     |     |     |     |             |                     |       | SSSPKPCA         | SP |
| N-Myc Sus scrofa     | ECV                                                                           |     |     |     |     |     |     |             |                     |       | DPAVVFPFPVNKREPA |    |

560 570 580 590 600 610 620 630 640 650 660

TaMYC8A DLNLG-----RSSAGPVIQVSKVDERPWE-Q-RTAGGGSSLLPVPKG-----LQSFT---WSQARGLNSHHQKF

TaMYC9A DVSR-----PPLPPVQTTGSDASWALR-LGGQAKQEAATAKPK-----LQSFT---WSQARGLNSHHQKF

TaMYC9B DVSR-----PPLPPVQTTGSDASWALR-LGGQAKQEAATAKPK-----LQSFT---WSQARGLNSHHQKF

TaMYC10A DLNLS-----RPLVNTGAVPLKMNERSWDMQ-KNCGGESLLLPVRKG-----LQNFT---WSQARGLNSHHQKF

TaMYC10B DLNLS-----RPLVNTGAVPLKMNERSWDMQ-KNCGGESLLLPVRKG-----LQNFT---WSQARGLNSHHQKF

TaMYC10D DLNLS-----RPLVNTGAVPLKMNERSWDMQ-KNCGGESLLLPVRKG-----LQNFT---WSQARGLNSHHQKF

TaMYC9D DVSR-----PPLPPVQTTGSDASWALR-LGGQAKQEAATAKPK-----LQSFT---WSQARGLNSHHQKF

TaMYC8D DLNLG-----RSSAGPVIQVSKVDERPWE-Q-RTAGGGSSLLPVPKG-----LQSFT---WSQARGLNSHHQKF

TaMYC3D PAGDMKESPPSVEISV---SKP-----PPQPPQIHHFENGSTSTLTENPSLSVHAQQPPPPQAAAAAQQRNQ---HQOQLQHQLQLQHQNQGPFRRRLNF

TaMYC3B PAGDMKESPPSVEISV---SKP-----PPQPPQIHHFENGSTSTLTENPSLSVHAQQPPPPQAAAAAQQRNQ---HQOQLQHQLQLQHQNQGPFRRRLNF

TaMYC12B DLNHN-----AIEGMISELREVECLSDVNLECVTKE---MDEFQFLEGLDSCAL---EDLESFM---W---HGRLKQEST

TaMYC5B DLNHE-----SIAAIIPEGELGEVECLSDGNLEIRITKE---INGFYGLCDELDVSCAL---EDLESFM---W---HGRLKQEST

TaMYC5D DLNHN-----TMATMMPGELELGEVECLSDGNLEIRITKE---INGFYGLCDELDVSCAL---EDLESFM---W---HGRLKQEST

TaMYC4A OKLINSNSKLSCTSVI---NIQDADYNNIDDFILAYMAQEYQHTCGSTTVLNDVVTS-D-SSISHKMKDLDAIPR---EDLESFM---W---HGRLKQEST

TaMYC3B DDEMEYDDDEIDAGC---TS-----GSASHDDHATHNAGSSELQVMSERVR-DGCSNNDDEIRKMLV---CQ---NGTSDHNSLHGQDE

TaMYC3A PAGDMKESPPSVEISV---SKP-----PPQPPQIHHFENGSTSTLTENPSLSVHAQQPPPPQAAAAAQQRNQ---HQOQLQHQLQLQHQNQGPFRRRLNF

TaMYC4D OKLINSNSKLSCTSVI---NIQDADYNNIDDFILAYMAQEYQHTCGSTTVLNDVVTS-N-SSISHKMKDLDAIPR---EDLESFM---W---HGRLKQEST

TaMYC7D DLNHN-----VAERFISELGEVESMSDANINCATKE---VDDFYDIEELDVCAL---EDLESFM---W---HGRLKQEST

TaMYC4B OKLINSNSKLSCTSVI---NIQDADYNNIDDFILAYMAQEYQHTCGSTTVLNDVVTS-N-SSISHKMKDLDAIPR---EDLESFM---W---HGRLKQEST

TaMYC11D DFDHN-----DTVEGVTSEQREVECLSDGNLEIRITKE---INGFYGLCDELDVSCAL---EDLESFM---W---HGRLKQEST

TaMYC1 VLNHN-----TMAMMIPGELELGEVECLSDGNLEIRITKE---INGFYGLCDELDVSCAL---EDLESFM---W---HGRLKQEST

TaMYC2A DDEMEYDDDEIDAECA---S-----GSASHDDHATHNAGSSELQVMSERVR-DGCSNNDDEIRKMLV---CQNSTDDHNSLHGQNE

TaMYC8B DLNLG-----RSSAGPVIQVSKVDERPWE-Q-RTAGGGSSLLPVPKG-----LQSFT---WSQARGLNSHHQKF

TaMYC6D DLNHN-----TMATMMPGELELGEVECLSDGNLEIRITKE---INGFYGLCDELDVSCAL---EDLESFM---W---HGRLKQEST

TaMYC7B DLNHN-----AIEGMISELREVECLSDGNLEIRITKE---INGFYGLCDELDVSCAL---EDLESFM---W---HGRLKQEST

TaMYC7A DLNHN-----TIEGMISELREVECLSDGNLEIRITKE---INGFYGLCDELDVSCAL---EDLESFM---W---HGRLKQEST

BdMYC1 DDDDI---GAECASGSGTNTGRNYSRDAPLNIIVGNTDDQATPNAGSSELQVMSERVR-DGCSNNDDEIRKMLV---CQNSNDQSDFRQDEPYE

BdMYC2 DDDDI---GAECASGSG---TNAGRNYSQDTPLNIIVGNTDDQATPNAGSSELQVMSERVR-DGCSNNDDEIRKMLV---CQNSNDQSDFRQDEPCD

BdMYC3 OKLINSNSKLSCTSVI---NIQDADYNNIDDFILAYMAQEYQHTCGSTTVLNDVVTS-N-SSISHKMKDLDAIPR---EDLESFM---W---HGRLKQEST

BdMYC4 DLNLG-----RPSAAPVIGVPGKDEERSWEQR-AAGAGVGSLLPVPKG-----LQNFT---WSQARGLNSHHQKF

BdMYC5 ELSRG-----AAQTGCQATWAAAP---LRLGGQAMAATRFAPK-----LQNFT---WSQARGLNSHHQKF

BdMYC6 QQPAM-----AAAEQEFYAATSVASLNLFDGSGGGAGGDDQFLAA-----LQNFT---WSQARGLNSHHQKF

BdMYC7 PVGDMKESPPSVEISV---SKP-----PPQPPQIHHFENGSTSTLTENPSLSVHAQQPPPPQAAAAAQQRNQ---HQOQLQHQLQLQHQNQGPFRRRLNF

OsMYC1 DLNLG-----RPSAAPVIGVPGKDEERSWEQR-AAGAGVGSLLPVPKG-----LQNFT---WSQARGLNSHHQKF

OsMYC7 ELSPG-----RPSQPMGCDAPWTPR-----LVQTT-----LQNFT---WSQARGLNSHHQKF

OsMYC4 PLNPNVNSISGRREC---SIEQHGSCRNEMETITGRASSSTGKTNINKVDLLSQCLVGCQASNATSVIRKFTQMSIVDNTKLQDGS---YAIPIHAALVDSTQY

OsMYC5 DAQRL-----MYGSSSLNLDAAADDDPFLGGGGGDAVGEAATAA-----LQNFT---WSQARGLNSHHQKF

OsMYC6 LITHN-----AIEEGQMVVSDECVSNANRDPITM-E-IDELYSIYEDLDMDMD-----LQNFT---WSQARGLNSHHQKF

OsMYC7 LDHGNAAVEATTTTV---PG-----EPHAGVAGGEVACEPNSDNLEIQTMD---IGELYSICEELDVRP-----LQNFT---WSQARGLNSHHQKF

OsMYC72 PFMDMKDSISAADISV---SKP-----PPQPPQIHHFENGSTSTLTENPSLSVHAQQPPPPQAAAAAQQRNQ---HQOQLQHQLQLQHQNQGPFRRRLNF

AtMYC3 PTNTG-----IESPARVNNGNNSNSKSDSHQISKLE-KNDISSVENQNRQSSC-----LQNFT---WSQARGLNSHHQKF

AtMYC5 -----SGAPNSNELFPFQLE---SSCSSTVTGNPSPSPV-----LQNFT---WSQARGLNSHHQKF

AtMYC4 PNGVD-----SGLVAAPVMNNGNDSTNSDSQPIIS-KLCNGSSVENPDKVL-----LQNFT---WSQARGLNSHHQKF

AtEGL3 APTPTTSTSGFEQEP---DHDSFINDGASQVQSWQFVGEIISNCIHQSLNSSDCVSTQF---VGTGTRACDPRKSRI-----LQNFT---WSQARGLNSHHQKF

AMS DIQK-----GSKEDMMNLFPSSYDIS---ADQIRLNLFLPCMSDY-----LQNFT---WSQARGLNSHHQKF

AtTT8 EMTMS-----EEMRLGSPDDEDVSNQNLHSDLE---IESTHTLDTHMDMNL-----LQNFT---WSQARGLNSHHQKF

AtMYC2 PIGTP-----GSNEPGNAGPSSSSQLFSKSIQFE---NGSSSTLTENPNDPT-----LQNFT---WSQARGLNSHHQKF

AtMYC1 EKHL-----PLGISDEDLHYKRTISTVLNYSADRSG-KNDKNIRHROPILVTS-----LQNFT---WSQARGLNSHHQKF

L-Myc Homo sapiens BSPSD-----SENEEIDVVTVEKRQSLG---IRKPVTITVRADPLD-----LQNFT---WSQARGLNSHHQKF

myc Homo sapiens SSASFSPSSD-----LLSSTESSPQGSPEPLVLEETPTTSSD-SEEEQEDEEEDVVS-----LQNFT---WSQARGLNSHHQKF

L-myc-2 Homo sapiens BSPSD-----SENEEIDVVTVEKRQSLG---IRKPVTITVRADPLD-----LQNFT---WSQARGLNSHHQKF

N-myc Homo sapiens PVPAPASAPAAAGPAVASGAGIAPAGAPVAPPRPGGRQTSGGDHKALSTSGEDTLDSDDEDEDEEEDVVTV-----LQNFT---WSQARGLNSHHQKF

myc Bos taurus STAFSPSSD-----LLSSAESSPRASPEPLALHEETPTTSSD-SEEEQEDEEEDVVS-----LQNFT---WSQARGLNSHHQKF

L-Myc Bos taurus BSPSD-----SENEEIDVVTVEKRQSLG---IRKPVTITVRADPLD-----LQNFT---WSQARGLNSHHQKF

N-myc Mus musculus SVPAAPTSAPATSAAV---TSVSVPATAPVAAPARAGGRPASSGEAKALSTSGEDTLDSDDEDEDEEEDVVTV-----LQNFT---WSQARGLNSHHQKF

c-myc Mus musculus PSSDS-----LLSSAESSPRASPEPLVLEETPTTSSD-SEEEQEDEEEDVVS-----LQNFT---WSQARGLNSHHQKF

L-myc Mus musculus BSPSD-----SENEEIDVVTVEKRQSLG---IRKPVTITVRADPLD-----LQNFT---WSQARGLNSHHQKF

s-myc Mus musculus KREPM-----PVPTIPTSTGSAISLGHQGLSSLEDPLNSGSGVEEGGEETVVMLEETQ-----LQNFT---WSQARGLNSHHQKF

L-Myc Sus scrofa BSPSD-----SENEEIDVVTVEKRQSLG---IRKPVTITVRADPLD-----LQNFT---WSQARGLNSHHQKF

n-Myc Sus scrofa STAFSPSSD-----LLSSAESSPRASPEPLALHEETPTTSSD-SEEEQEDEEEDVVS-----LQNFT---WSQARGLNSHHQKF

N-Myc Sus scrofa PAPAAPAVAPAACTVIVSGASAAAPAGAPVAALRPGGRPASGDHAKALSTSGEDTLDSDDEDEDEEEDVVTV-----LQNFT---WSQARGLNSHHQKF



|                      | 670                            | 680                                | 690                            | 700            | 710 | 720 | 730 | 740 | 750 | 760 | 770 |                     |
|----------------------|--------------------------------|------------------------------------|--------------------------------|----------------|-----|-----|-----|-----|-----|-----|-----|---------------------|
| TaMYC8A              | NGGILIVSNEATHGNNRTADSS         | TTTQFQLQKAPQLQKLP                  | LLQKPPQLVKPLQMVNQQL            |                |     |     |     |     |     |     |     | QPQAPRCIDFSAGTS--   |
| TaMYC9A              |                                |                                    |                                |                |     |     |     |     |     |     |     | QQEPPKTISSFNNAVQ--  |
| TaMYC9B              |                                |                                    |                                |                |     |     |     |     |     |     |     | QQEPPKTISSFNKAVD--  |
| TaMYC10A             | NGGILVVKNETSQRSNGAAHSPGLSPFQ   | LQNSQQILTQPPP                      |                                |                |     |     |     |     |     |     |     | QSQTPRHIDFSVSGSS--  |
| TaMYC10B             | NGGILVVKSETSQRSNGAAHSPGLSPFQ   | LQNSQQILTQPPP                      |                                |                |     |     |     |     |     |     |     | QSQTPRHIDFSVSGSS--  |
| TaMYC10D             | NGGILVVKSETSQRSNGAAHSPGLSPFQ   | IRNSQQILTQPPP                      |                                |                |     |     |     |     |     |     |     | QSQTPRHIDFSVSGSS--  |
| TaMYC9D              |                                |                                    |                                |                |     |     |     |     |     |     |     | QQEPPKTISSFSDD--    |
| TaMYC8D              | NGGILIVSNEATHGNNRTADSS         | TTTQFQLQKAPQLQKLP                  | LLQKPPQLVKPLQMVNQQL            |                |     |     |     |     |     |     |     | QPQAPRCIDFSAGTS--   |
| TaMYC3D              | SDFASNASVTVPFFPKPESGEILNFGADST | SRNPSAPPAAATASLT                   | TAPGSLFSQHTATVTAPSNDAKNNPKRSM  | EATSRASNTNHHQN |     |     |     |     |     |     |     | ATANEGLMISFSSAPT--  |
| TaMYC3B              | SDFASNASVTVPFFPKPESGEILNFGADST | SRNPSAPPAAATASLT                   | TAPGSLFSQHTATVTAPSNDAKNNPKRSM  | EATSRASNTNHHQT |     |     |     |     |     |     |     | ATANEGLMISFSSAPT--  |
| TaMYC12B             |                                |                                    |                                |                |     |     |     |     |     |     |     | PCTEDVIVITLSSSVQG-- |
| TaMYC5B              |                                |                                    |                                |                |     |     |     |     |     |     |     | DGTTDGAVTFSFVFEF--  |
| TaMYC5D              |                                |                                    |                                |                |     |     |     |     |     |     |     | DGTTDGAVTFSFVFEF--  |
| TaMYC4A              | SHSLQANGNKAYSYSHLE             | TNDYAEFLVDAITNQVGNIPNSCSYHSTDS     |                                |                |     |     |     |     |     |     |     | STSSSETQTQREDHALRL  |
| TaMYC2A              | AWHFLYEELCSGYPQSSAAGEN         |                                    |                                |                |     |     |     |     |     |     |     | LRQANGLNTRSYLAV--   |
| TaMYC3A              | SDFASNASVTVPFFPKPESGEILNFGADST | SRNPSAPPAAATASLT                   | TAPGSLFSQHTATVTAPSNDAKNNPKRSM  | EATSRASNTNHHQT |     |     |     |     |     |     |     | ATANEGLMISFSSAPT--  |
| TaMYC4D              | SHSLQANGNKAYSYSHLE             | TNDYAEFLVDAITNQVGNIPNSCSYHSTDS     |                                |                |     |     |     |     |     |     |     | STSSSETQTQREDHALRF  |
| TaMYC7D              |                                |                                    |                                |                |     |     |     |     |     |     |     | LRIDDDNTITLSSVNG--  |
| TaMYC3D              | SHSLQANGNKAYSYSHLE             | TNDYAEFLVDAITNQVGNIPNSCSYHSTDS     |                                |                |     |     |     |     |     |     |     | STSSSETQTQREDHPLRL  |
| TaMYC11D             |                                |                                    |                                |                |     |     |     |     |     |     |     | PSTDVVIVITLSSRSEG-- |
| TaMYC1               |                                |                                    |                                |                |     |     |     |     |     |     |     | NGITNGAVTILSSVEF--  |
| TaMYC2A              | AWHFLYEELCSGYPQSS              |                                    |                                |                |     |     |     |     |     |     |     | LRQGGGLNTGSLYAV--   |
| TaMYC8B              | NGGILIVSNEATHGNNRAADSS         | TTTQFQLQKAPQLQKLP                  | LLQKPPQLVKPLQMVNQQL            |                |     |     |     |     |     |     |     | QPQAPRCIDFSAGTS--   |
| TaMYC6D              |                                |                                    |                                |                |     |     |     |     |     |     |     | GLEEIMGLCRSVAAP--   |
| TaMYC7B              |                                |                                    |                                |                |     |     |     |     |     |     |     | PRIDDDNTITLSSVNG--  |
| TaMYC7A              |                                |                                    |                                |                |     |     |     |     |     |     |     | PCTEDVNVITLSSVEG--  |
| BdMYC1               | SWHFLYEELCSGYPQSSGENQDIV       |                                    |                                |                |     |     |     |     |     |     |     | RRQAASTNTRSYVAA--   |
| BdMYC2               | SWHFLYEELCSGYPQSSAGENQDM       |                                    |                                |                |     |     |     |     |     |     |     | RRQAASTNTRSYVAA--   |
| BdMYC3               | SHSLRQANGSKTYFYSHLENADYTE      | FLLDALTNQVGNIPNSD                  |                                |                |     |     |     |     |     |     |     | SSHSTDYTSCETPIQR    |
| BdMYC4               | NGGILIVSNEVPH-NNGAADSPTTAQ     | FQLQKATQLQKLP                      | QLQKPPQLVKPLQMVNQQL            |                |     |     |     |     |     |     |     | QAQAPRCIDFSAGTS--   |
| BdMYC5               |                                |                                    |                                |                |     |     |     |     |     |     |     | EPSPKRSINFIQQPD--   |
| BdMYC6               |                                |                                    |                                |                |     |     |     |     |     |     |     | AAHEQQQLYSGGAAAAA   |
| BdMYC7               | SDFATNASVTVPFFPKPESGEILNFGADST | SRNPSAPPAAAAASLT                   | TAPGSLFSQHTATVTAPTNEAKNNPKRSM  | EATSRASNTNHHPS |     |     |     |     |     |     |     | ATANEGLMISFSSAPT--  |
| OsMYC1               | NGGILIVSNEATPRNNGVDSS          | TATQFQLQKAPPLQKLP                  | QLQKSHQLVKPQQILVSSQQQL         |                |     |     |     |     |     |     |     | QPQAPRCIDFSAGTS--   |
| OsMYC7               |                                |                                    |                                |                |     |     |     |     |     |     |     | PVRPAKSLDFSKAN--    |
| OsMYC4               | SDCFQSLGLTIQSSSSSNSNAIHVD      | TSHNAVHCKSNFCPLGDRNAANSSDLAELLASPI |                                |                |     |     |     |     |     |     |     | LELTGGNDLFDVLQLQG   |
| OsMYC5               |                                |                                    |                                |                |     |     |     |     |     |     |     | PSVAVAQEQMOHAAAGG   |
| OsMYC6               |                                |                                    |                                |                |     |     |     |     |     |     |     | TEAVAAAAAADVDGVA    |
| OsMYC7               |                                |                                    |                                |                |     |     |     |     |     |     |     | DDVVAAADSSSIDGSC    |
| OsMYC72              | SDFASN-GGAAAPFFKPE             | TGEILNFGNDSSSRNPSAPPAAATASLT       | TAPGSLFSQHTPTLTAAANDAKSNNQKRSM | EATSRASNTNHHPS |     |     |     |     |     |     |     | ATANEGLMISFSSAPT--  |
| AtMYC3               |                                |                                    |                                |                |     |     |     |     |     |     |     | SNNDEGMLSFSTVVR--   |
| AtMYC5               |                                |                                    |                                |                |     |     |     |     |     |     |     | LARAPCGDVLSEGEN--   |
| AtMYC4               |                                |                                    |                                |                |     |     |     |     |     |     |     | SNNDEGMLSFSTVLP-C   |
| AtEGL3               |                                |                                    |                                |                |     |     |     |     |     |     |     | LILGPQFQNF--        |
| AMS                  |                                |                                    |                                |                |     |     |     |     |     |     |     | NKEMGMNPNFTVEE--    |
| AtTT8                |                                |                                    |                                |                |     |     |     |     |     |     |     | SLSDSVSTYSYIQS--    |
| AtMYC2               |                                |                                    |                                |                |     |     |     |     |     |     |     | SSGNPDPSYSGQTQFE    |
| AtMYC1               |                                |                                    |                                |                |     |     |     |     |     |     |     |                     |
| L-Myc Homo sapiens   |                                |                                    |                                |                |     |     |     |     |     |     |     | ARFPPESCSQEEASERG   |
| myc Homo sapiens     |                                |                                    |                                |                |     |     |     |     |     |     |     | PPHSPVLVKRCHVS--    |
| L-myc-2 Homo sapiens |                                |                                    |                                |                |     |     |     |     |     |     |     | ARFPPESCFQEGAPKRM   |
| N-myc Homo sapiens   |                                |                                    |                                |                |     |     |     |     |     |     |     | RAQSSSELTKRCVPI--   |
| myc Bos taurus       |                                |                                    |                                |                |     |     |     |     |     |     |     | PPHSPVLVKRCHVS--    |
| L-Myc Bos taurus     |                                |                                    |                                |                |     |     |     |     |     |     |     | ARFPPESCSQGAPBPG    |
| N-myc Mus musculus   |                                |                                    |                                |                |     |     |     |     |     |     |     | RAQPGELTKRCVPI--    |
| c-myc Mus musculus   |                                |                                    |                                |                |     |     |     |     |     |     |     | PPHSPVLVKRCHVS--    |
| L-myc Mus musculus   |                                |                                    |                                |                |     |     |     |     |     |     |     | ARFPPESCSQEGDPEPG   |
| s-myc Mus musculus   |                                |                                    |                                |                |     |     |     |     |     |     |     | CAQSSSELTKRYDLI--   |
| L-Myc Sus scrofa     |                                |                                    |                                |                |     |     |     |     |     |     |     | ARFPPESCSQGAPBPG    |
| n-Myc Sus scrofa     |                                |                                    |                                |                |     |     |     |     |     |     |     | PPHSPVLVKRCHVS--    |
| N-Myc Sus scrofa     |                                |                                    |                                |                |     |     |     |     |     |     |     | RAPAGELTKRCVPI--    |

|                      | 780                            | 790                                 | 800                                           | 810           | 820           | 830 | 840 | 850 | 860 | 870 | 880 |
|----------------------|--------------------------------|-------------------------------------|-----------------------------------------------|---------------|---------------|-----|-----|-----|-----|-----|-----|
| TaMYC8A              | -SKSGVLV                       | TR--AAVL                            | DGDSSEV                                       | NGLCKEEG      | TFVLE         |     |     |     |     |     |     |
| TaMYC9A              | -AKQAGG                        |                                     |                                               |               |               |     |     |     |     |     |     |
| TaMYC9B              | -AKQAGG                        |                                     |                                               |               |               |     |     |     |     |     |     |
| TaMYC10A             | -SKSGVLT                       | SQ--AALL                            | GGENG                                         | VDGLCKEQVAPAM |               |     |     |     |     |     |     |
| TaMYC10B             | -SKSGVLT                       | SQ--AALL                            | GGENG                                         | VDGLCKEQVAPAM |               |     |     |     |     |     |     |
| TaMYC10D             | -SKSGVLT                       | SQ--AALL                            | GGENG                                         | VDGLCKEQVAPAM |               |     |     |     |     |     |     |
| TaMYC9D              | -AKQAGG                        |                                     |                                               |               |               |     |     |     |     |     |     |
| TaMYC8D              | -SKSGVLV                       | TR--AAVL                            | DGDSSEV                                       | NGLCKEEG      | TFVLE         |     |     |     |     |     |     |
| TaMYC3D              | -TRPSTGT                       | GA--PAKSE                           | SDHSDLEASVREVE                                | SSRVVP        |               |     |     |     |     |     |     |
| TaMYC3B              | -TRPSTGT                       | GA--PAKSE                           | SDHSDLEASVREVE                                | SSRVVP        |               |     |     |     |     |     |     |
| TaMYC12B             | -TRPSCFI                       | AW--RRSLE                           | LKDMVVRVTDTEES                                | SKLLKKI       |               |     |     |     |     |     |     |
| TaMYC5B              | -SRSSCFT                       | AW--KRSLD                           | STEDVDTSVAGES                                 | SKLLKKV       |               |     |     |     |     |     |     |
| TaMYC5D              | -SRSSCFT                       | AW--KRSLD                           | STKDVAASVAGES                                 | SKLLKKV       |               |     |     |     |     |     |     |
| TaMYC4A              | DSSTSCGTQIQREDHALRLEESAIPDPF   | GGREFSLTSVEEGFMTSKMTVSLP            |                                               |               |               |     |     |     |     |     |     |
| TaMYC2B              | -SHQSSFS                       | RW--DAGIH                           | GRRTVAQGTTRQKMKSVLLFFS                        |               |               |     |     |     |     |     |     |
| TaMYC3A              | -TRPSTGT                       | GA--PAKSE                           | SDHSDLEASVREVE                                | SSRVVP        |               |     |     |     |     |     |     |
| TaMYC4D              | DSSTSCGTQIQREDHALSLEESTIPDPS   | GGREFSPTSVEEGFMTSKMTVSLP            |                                               |               |               |     |     |     |     |     |     |
| TaMYC7D              | -SRPSCFT                       | VW--KRSSD                           | WEDMDVRDLGES                                  | SKLLKKV       |               |     |     |     |     |     |     |
| TaMYC4B              | DSSTSCGTQIQREDHALRLEESAIPDPF   | GGREFSPASVKEGFMTSKMTVSLP            |                                               |               |               |     |     |     |     |     |     |
| TaMYC11D             | -SRPSCFT                       | AW--KGSSE                           | LKYVPGQVVGES                                  | SKLLTKV       |               |     |     |     |     |     |     |
| TaMYC1               | -SRSSCFT                       | AW--KRSWD                           | SAEDMATLVARE                                  | SKLLKKA       |               |     |     |     |     |     |     |
| TaMYC2A              | -SLQSSFS                       | RW--DAGIH                           | GRRTVAQGTTRQKMKSVLLFFS                        |               |               |     |     |     |     |     |     |
| TaMYC8B              | -SKSGVLV                       | TR--AAVL                            | DGDSSEV                                       | NGLCKEEG      | TFVLE         |     |     |     |     |     |     |
| TaMYC6D              |                                |                                     |                                               |               |               |     |     |     |     |     |     |
| TaMYC7B              | -SRPSCFT                       | VW--KRSSD                           | WEDMDVRDPGES                                  | SKLLKKV       |               |     |     |     |     |     |     |
| TaMYC7A              | -TRPSCFI                       | AW--RRSTE                           | SKEADARVTEES                                  | SKLLKKI       |               |     |     |     |     |     |     |
| BdMYC1               | -SHQSSFS                       | TW--HPTML                           | QQGRTATGAGGTTQORMLGSLFNNA                     | AAAA          |               |     |     |     |     |     |     |
| BdMYC2               | -SHQSSFS                       | TW--HPTML                           | QQGRTATGAGGTTQORMLRVLFNNA                     | AAAA          |               |     |     |     |     |     |     |
| BdMYC3               | EDHSLRLLE                      | EWVSP                               | DPSGGQEFSPISVNEGFTSPKINLSFP                   |               |               |     |     |     |     |     |     |
| BdMYC4               | -SKSGVLV                       | AR--TAVLD                           | GESSEV                                        | NGLCKEEG      | APPLI         |     |     |     |     |     |     |
| BdMYC5               | -AKQAGG                        |                                     |                                               |               |               |     |     |     |     |     |     |
| BdMYC6               | RAESGSGEG                      |                                     |                                               |               |               |     |     |     |     |     |     |
| BdMYC7               | -TRPSTGT                       | GA--PAKSE                           | SDHSDLEASVREVE                                | SSRVVP        |               |     |     |     |     |     |     |
| OsMYC1               | -SKPGVLT                       | KK--PAGID                           | GDGA                                          | EV            | DGLCKDEGPPPAL |     |     |     |     |     |     |
| OsMYC7               | -VPEQAGG                       |                                     |                                               |               |               |     |     |     |     |     |     |
| OsMYC4               | KPNGSNNSEVNNRQSMYPYGSEQAVKSLIG | CVDDFTGLITEADPDQLLDAIVSKIITGHKQNVDT | SASCSTTVAGFDRPLHSDCHLYTTGPSSGPIFCNFASVAPVAIKT |               |               |     |     |     |     |     |     |
| OsMYC5               | VAESGSGEG                      |                                     |                                               |               |               |     |     |     |     |     |     |
| OsMYC6               | NSQVSCFM                       | AW--KSAKS                           | NEMAVPVVTGIES                                 | SKLLKKV       |               |     |     |     |     |     |     |
| OsMYC7               | RSPSSSFV                       | AW--KRTAD                           | SDEVQAVPLISGEPP                               | SKLLKKAV      |               |     |     |     |     |     |     |
| OsMYC72              | -TRPSTGT                       | GA--PAKSE                           | SDHSDLEASVREVE                                | SSRVVAPP      |               |     |     |     |     |     |     |
| AtMYC3               |                                |                                     |                                               |               |               |     |     |     |     |     |     |
| AtMYC5               | -VKQSFEEN                      |                                     |                                               |               |               |     |     |     |     |     |     |
| AtMYC4               | DSNHSDLE                       |                                     |                                               |               |               |     |     |     |     |     |     |
| AtEGL3               | -DKRSSFT                       | RW--KRSSS                           | VKTLGEKSKMIKKIL                               |               |               |     |     |     |     |     |     |
| AMS                  | -DGIPVIG                       |                                     |                                               |               |               |     |     |     |     |     |     |
| AtTT8                |                                |                                     |                                               |               |               |     |     |     |     |     |     |
| AtMYC2               | NKKRSMV                        | LNEDK                               | VLSFGDKTAGESDHS                               | DLASVYKE      |               |     |     |     |     |     |     |
| AtMYC1               | -EPGSSFL                       | RW--KQCE                            | QQVSGFVQKKKSNVLRKI                            |               |               |     |     |     |     |     |     |
| L-Myc Homo sapiens   | -PQEEVLE                       |                                     |                                               |               |               |     |     |     |     |     |     |
| myc Homo sapiens     | -HQHNYA                        |                                     |                                               |               |               |     |     |     |     |     |     |
| L-myc-2 Homo sapiens | PRKEALER                       |                                     |                                               |               |               |     |     |     |     |     |     |
| N-myc Homo sapiens   | -HQHNYA                        | AP--SPY                             | VESEDAPPQKKIKSEASEP                           | PKSVI         |               |     |     |     |     |     |     |
| myc Bos taurus       | -HQHNYA                        |                                     |                                               |               |               |     |     |     |     |     |     |
| L-Myc Bos taurus     | PREDGLE                        |                                     |                                               |               |               |     |     |     |     |     |     |
| N-myc Mus musculus   | -HQHNYA                        | AP--SPY                             | VESEDAPPQKKIKSEASEP                           | PKSVV         |               |     |     |     |     |     |     |
| c-myc Mus musculus   | -HQHNYA                        |                                     |                                               |               |               |     |     |     |     |     |     |
| L-myc Mus musculus   | PQEEAPEI                       |                                     |                                               |               |               |     |     |     |     |     |     |
| s-myc Mus musculus   | -QEQHNYA                       |                                     |                                               |               |               |     |     |     |     |     |     |
| L-Myc Sus scrofa     | -PQAEPL                        |                                     |                                               |               |               |     |     |     |     |     |     |
| n-Myc Sus scrofa     | -HQHNYA                        |                                     |                                               |               |               |     |     |     |     |     |     |
| N-Myc Sus scrofa     | -HQHNYA                        | AP--SPY                             | VESEDAPPQKKIKSEASEP                           | PKSVV         |               |     |     |     |     |     |     |



Basic Helix

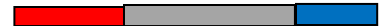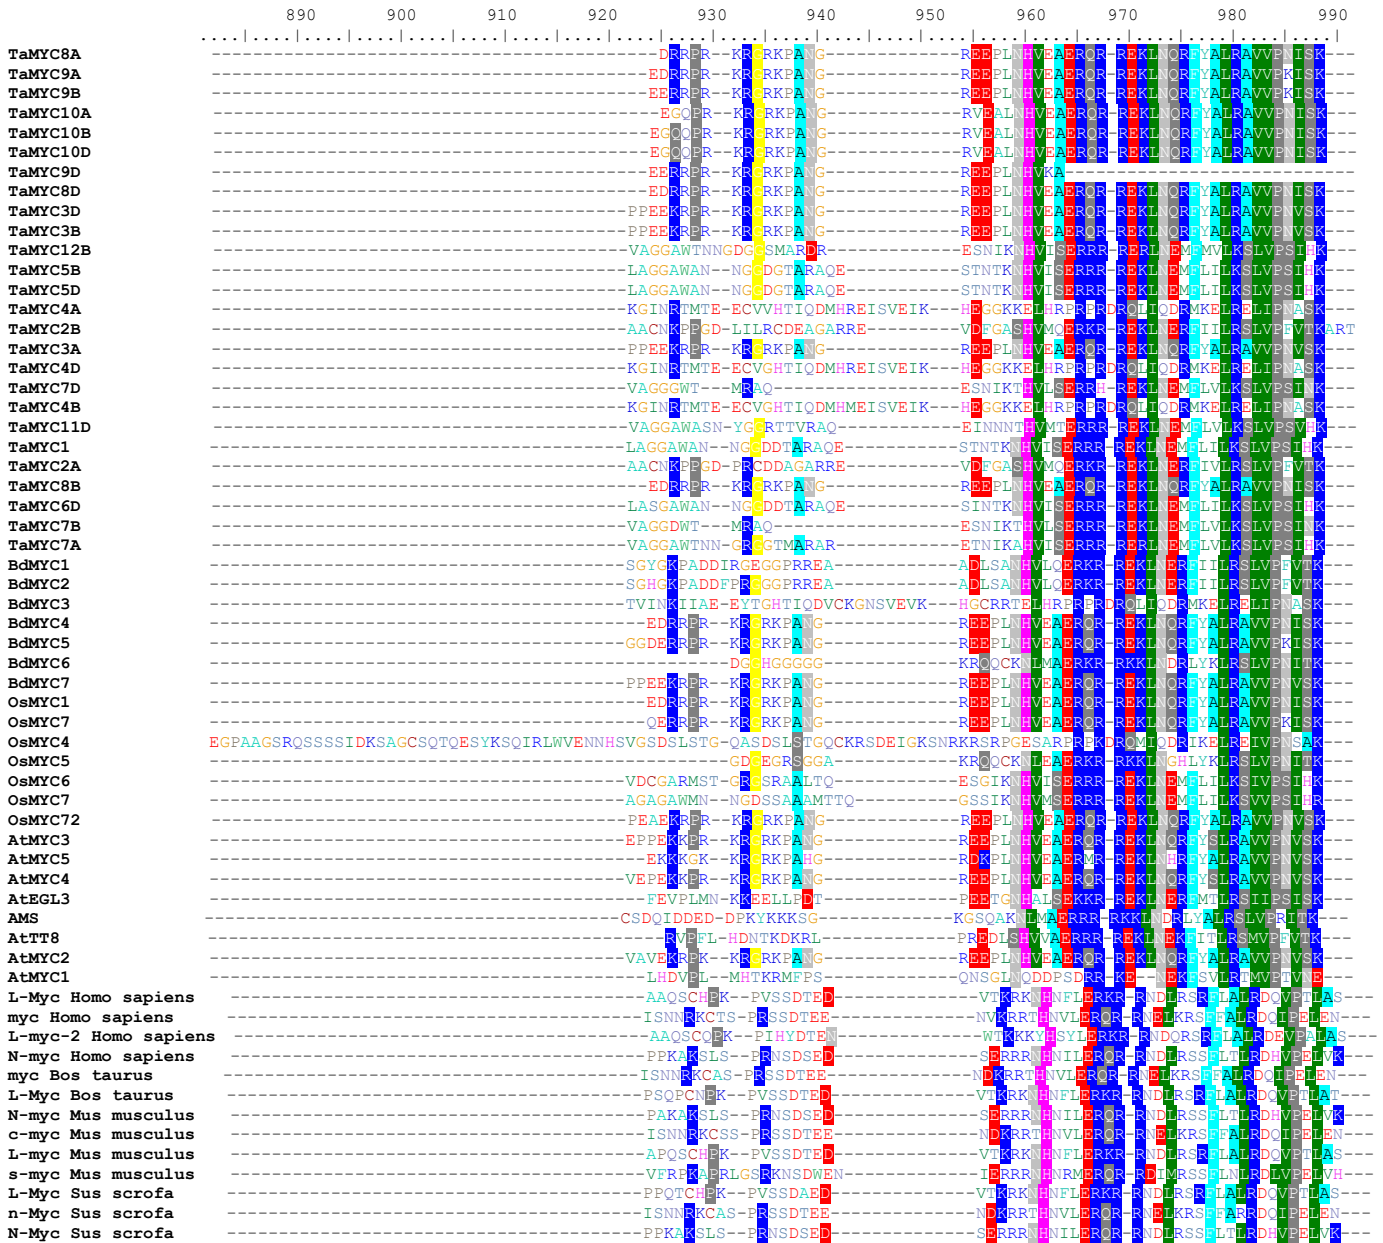

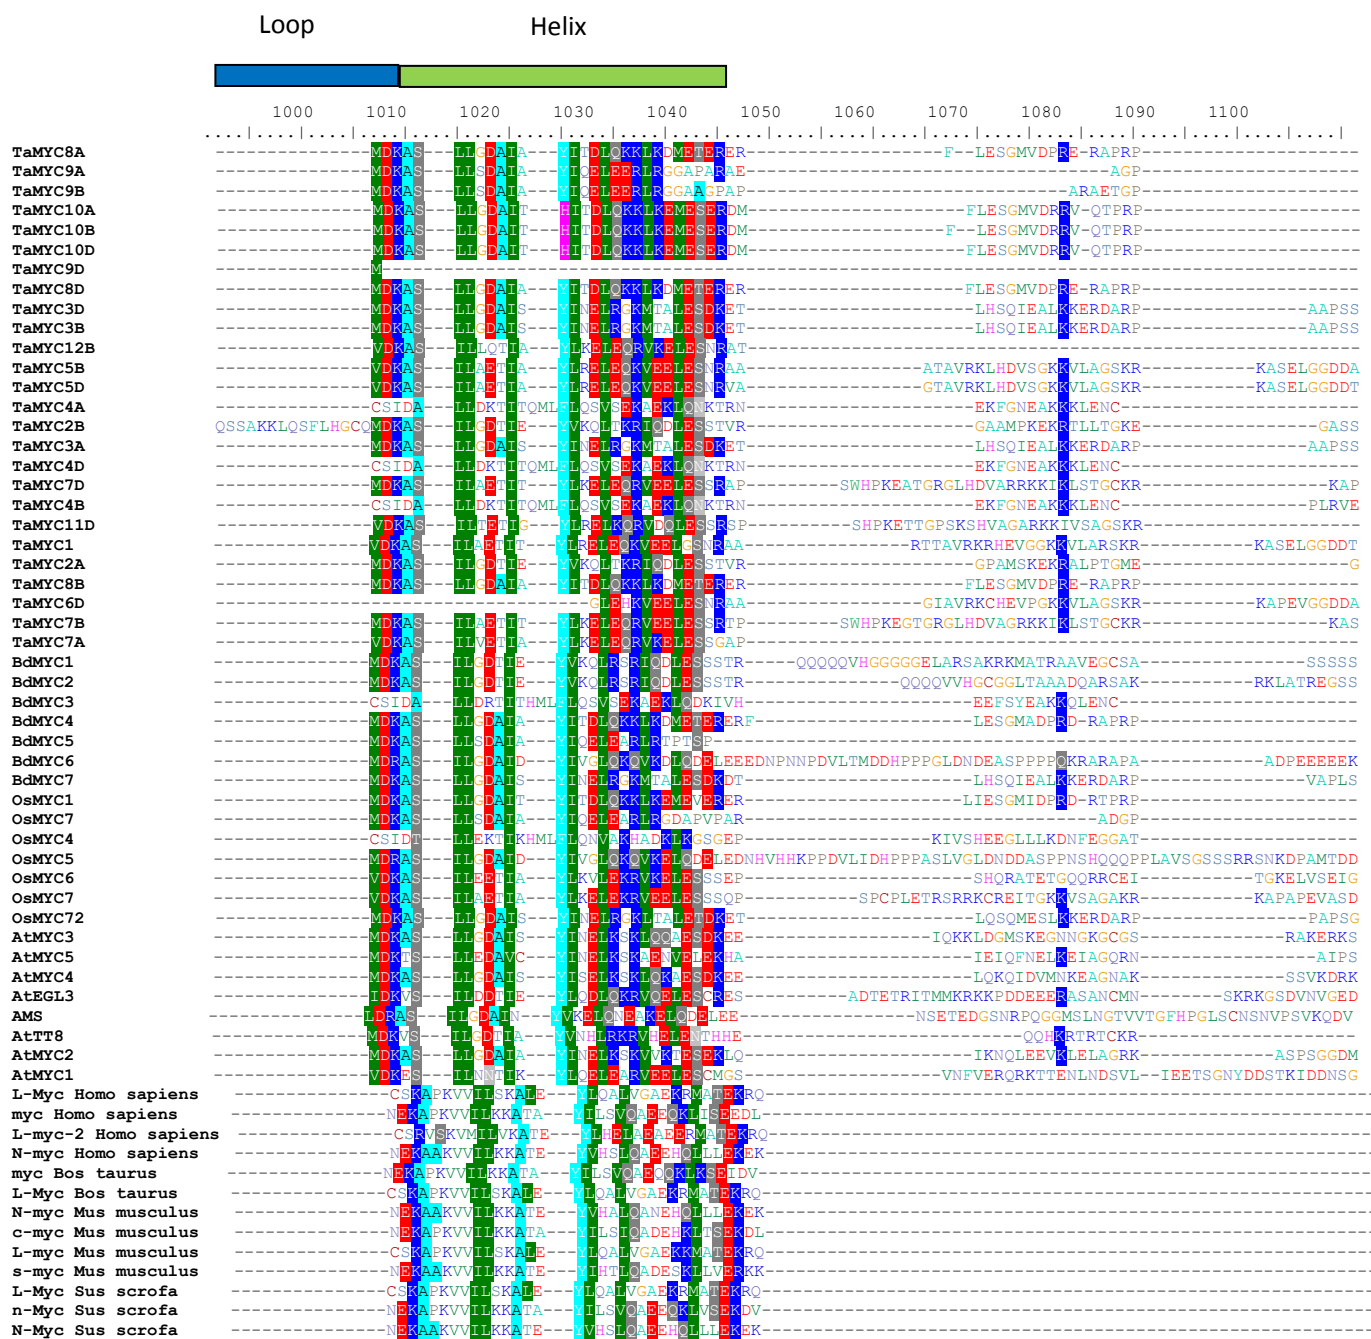

## Leucine zipper

|                      | 1110                                           | 1120      | 1130          | 1140                 | 1150          | 1160             | 1170                                 | 1180                       | 1190                        | 1200          | 1210              |  |
|----------------------|------------------------------------------------|-----------|---------------|----------------------|---------------|------------------|--------------------------------------|----------------------------|-----------------------------|---------------|-------------------|--|
| TaMYC8A              | -----                                          | -EVDIQVV- | QDEVLRVMSPL   | NHPVKKVFEAFEE-       | ADVRVGESKLT   | GNNGTVVHSFII     | -----                                | KCPGSEQ-QTREK              | VIAMSRAMSSV--               |               |                   |  |
| TaMYC9A              | -----                                          | -SVEVKAM- | QDEVVLRVSTPLD | AHPISGFLSAMRD-       | SQLEVVASSMAVA | DDTVHTTLVV       | -----                                | RSAGPER-LTAE               | AVLAATSRGVMSAT              |               |                   |  |
| TaMYC9B              | -----                                          | -SVEVKAM- | QDEVVLRVSTPLD | AHPISGFLSAMRD-       | SQLEVVASSMAVA | DDTVHTTLVV       | -----                                | RSAGPER-LTAE               | TVLAATSRGVMSAT              |               |                   |  |
| TaMYC10A             | -----                                          | -EVDIQVV- | QDEVLRVMSPM   | DNYPIANNVFOAFEE-     | AEVRVGESKLT   | SNNGKVMHSFVI     | -----                                | KSPGSEQ-QTREK              | LIAMSRAMNSM--               |               |                   |  |
| TaMYC10B             | -----                                          | -EVDIQVV- | QDEVLRVMSPM   | DNYPIANNVFOAFEE-     | AEVRVGESKLT   | SNNGKVMHSFVI     | -----                                | KSPGSEQ-QTREK              | LIAMSRAMNSM--               |               |                   |  |
| TaMYC10D             | -----                                          | -EVDIQVV- | QDEVLRVMSPM   | DNYPIANNVFOAFEE-     | AEVRVGESKLT   | SNNGKVMHSFVI     | -----                                | KSPGSEQ-QTREK              | LIAMSRAMNSM--               |               |                   |  |
| TaMYC9D              | -----                                          | -EVDIQVV- | QDEVVLRVSTPLD | AHPISGFLSAMRD-       | SQLEVVASSMAVA | DDTVHTTLVV       | -----                                | RSAGPER-LTAE               | TVLAATSRGVMSAT              |               |                   |  |
| TaMYC8D              | -----                                          | -EVDIQVV- | QDEVLRVMSPL   | NHPVKKVFEAFEE-       | ADVRVGESKLT   | GNNGTVVHSFII     | -----                                | KCPGSEQ-QTREK              | VIAMSRAMSSV--               |               |                   |  |
| TaMYC3D              | GMHDNGARCHAVEIEAKII                            | -----     | GDEAMIRVQCH   | KRNHPAAKIMTALRE-     | LDLVYHASVSVVK | DMIQQQVAV        | -----                                | KMATRVYSQDQ                | LNAAIYGRDAEPGT              |               |                   |  |
| TaMYC3B              | GMHDNGARCHAVEIEAKII                            | -----     | GDEAMIRVQCH   | KRNHPAAKIMTALRE-     | LDLVYHASVSVVK | DMIQQQVAV        | -----                                | KMATRVYSQDQ                | LNAAIYGRDAEPGT              |               |                   |  |
| TaMYC12B             | -----                                          | -EVDIQVV- | QDEVLRVMSPL   | NHPVKKVFEAFEE-       | ADVRVGESKLT   | GNNGTVVHSFII     | -----                                | KCPGSEQ-QTREK              | VIAMSRAMSSV--               |               |                   |  |
| TaMYC5B              | DRVLSKEDVPSNVVNVVT                             | -----     | EKEVLLVQCR    | WKELIMTQVFDATKS-     | LRLEVLVSRAST  | PDGLLALKIRA      | -----                                | QFAGPAA-VEPG               | MISEALQKATRRR--             |               |                   |  |
| TaMYC5D              | ERVLPKDDGSPNIVNVVT                             | -----     | DKEVLLVQCR    | WKELIMTQVFDATKS-     | LRLEVLVSRAST  | PDGLLALKIRA      | -----                                | QFAGPGA-VEPG               | MISEALQKATRRR--             |               |                   |  |
| TaMYC4A              | -----                                          | -FLRVEEL- | EEPGHLLIEL    | CKEYD-VFFETAHLFKG-   | DEVSILKGELE   | HRSGQLWARFVV     | -----                                | EASKCSNQMQ                 | ILCPMHLLQRR--               |               |                   |  |
| TaMYC2B              | SSGSSSSAPLATDVGVSTII                           | -----     | ESDALLELR     | CPDRRGILVTIMQAL      | DEQRLVTSVQAS  | DHGVLAEMRA       | -----                                | -----                      | KVQFLVVRSSV--               |               |                   |  |
| TaMYC3A              | GMHDNGARCHAVEIEAKII                            | -----     | GDEAMIRVQCH   | KRNHPAAKIMTALRE-     | LDLVYHASVSVVK | DMIQQQVAV        | -----                                | KMATRVYSQDQ                | LNAAIYGRDAEPGT              |               |                   |  |
| TaMYC4D              | -----                                          | -FLRVEEL- | EEPGHLLIEL    | CKEYD-VFFETAHLFKG-   | DEVSILKGELE   | HRSGQLWARFVV     | -----                                | EASKCSNQMQ                 | ILCPMHLLQRR--               |               |                   |  |
| TaMYC7D              | ESEREDDDGPTNVVNVVMM                            | -----     | DNEVILEVQCR   | WKELIMTQVFDATKS-     | LRLEIVSVHT    | STPGGILELKIRATH  | QVSTSPPPSKVAAGSGTVAPGMITEALQKATGNRWQ | -----                      | -----                       |               |                   |  |
| TaMYC4B              | ELE                                            | -----     | EPGHLLIEL     | CKEYD-VFFETAHLFKG-   | DEVSILKGELE   | HRSGQLWARFVV     | -----                                | EASKCSNQMQ                 | ILCPMHLLQRR--               |               |                   |  |
| TaMYC11D             | -----                                          | -KAPGLESP | SNVANVMM      | -----                | DKVVLLEVQCR   | WKELIMTQVFDATKS- | LRLEIVSVQASTSGGRLDLKIRANQ            | -----                      | QLAAGSAIVAPGATEALQKAT       |               |                   |  |
| TaMYC1               | ERVLPKDDGLSSVINNVVT                            | -----     | DNEVILEVQCR   | WKELIMTQVFDATKS-     | LRLEVLVSRAST  | PDGLLALKIRA      | -----                                | QFAGPGV-VETG               | MISEALQKATRRP--             |               |                   |  |
| TaMYC2A              | -----                                          | -EVDIQVV- | QDEVLRVMSPL   | NHPVKKVFEAFEE-       | ADVRVGESKLT   | GNNGTVVHSFII     | -----                                | KCPGSEQ-QTREK              | VIAMSRAMSSV--               |               |                   |  |
| TaMYC8B              | -----                                          | -EVDIQVV- | QDEVLRVMSPL   | NHPVKKVFEAFEE-       | ADVRVGESKLT   | GNNGTVVHSFII     | -----                                | KCPGSEQ-QTREK              | VIAMSRAMSSV--               |               |                   |  |
| TaMYC6D              | ERVLTKDDGLSSVINNVVT                            | -----     | DKEVLLVQCR    | WKELIMTQVFDATKS-     | LRLEVLVSRAVR  | -----            | VVIMVYDF                             | -----                      | -----                       |               |                   |  |
| TaMYC7B              | ESEREDDGSPNIVVNVMM                             | -----     | DNEVILEVQCR   | WKELIMTQVFDATKS-     | LRLEIVSVHT    | STPGGILELKIRATH  | -----                                | QVAGFATVAPGMITEALQKATGNRWQ | -----                       |               |                   |  |
| TaMYC7A              | -----                                          | -SPR      | -----         | -----                | -----         | -----            | -----                                | -----                      | -----                       |               |                   |  |
| BdMYC1               | SAPPSSSLAAAAEIVGVSTII                          | -----     | ESDALLELR     | CPDRRGILVTIMQAL      | DEQRLVTSVQAS  | DHGVLAELRA-K     | -----                                | VREYHGRSSIS                | EVKRAIALIITSSG--            |               |                   |  |
| BdMYC2               | ASSSSGSPVPATDVGVSTII                           | -----     | ESDALLELR     | CPDRRGILVTIMQAL      | DEQRLVTSVQAS  | DHGVLAELRA-K     | -----                                | VREYHGRSSIS                | EVKRAIALIITSSG--            |               |                   |  |
| BdMYC3               | -----                                          | -FLRVEEL- | EEPGHLLIEL    | CKEYD-VFFETAHLFKG-   | DEVSILKGELE   | HRSGQLWARFVV     | -----                                | EAPQGLKQM                  | ILCPMHLLQRR--               |               |                   |  |
| BdMYC4               | -----                                          | -EVDIQVV- | QDEVLRVMSPL   | NHPVKKVFEAFEE-       | ADVRVGESKLT   | GNNGTVVHSFII     | -----                                | KCPGSEQ-QTREK              | VIAMSRAMNSV--               |               |                   |  |
| BdMYC5               | -----                                          | -SVEVKAM- | QDEVVLRVSTPLD | AHPISGFLSAMRD-       | SQLEVVASSMAVA | DDTVHTTLVV       | -----                                | RSAGPDR-LTAE               | TVLAATSRGVMSAT              |               |                   |  |
| BdMYC6               | GEQEEQEQDMEPQVVRVQVGGGSEFFLQVLCSHKEGRFVIMDEIAA | -----     | GLQVTVNVNTSY  | NKLVLNVFRA           | -----         | -----            | -----                                | VMRENEAAV                  | PADRVDRSLLEVTRYMYG          |               |                   |  |
| BdMYC7               | GVHDGSGPRCHAVEIEAKII                           | -----     | GDEAMIRVQCH   | KRNHPAAKIMTALRE-     | LDLVYHASVSVVK | DMIQQQVAV        | -----                                | KMPNRVYSQDQ                | LNAAIYGRDAEPGA              |               |                   |  |
| OsMYC1               | -----                                          | -EVDIQVV- | QDEVLRVMSPL   | NHPVKKVFEAFEE-       | ADVRVGESKLT   | GNNGTVVHSFII     | -----                                | KCPGSEQ-QTREK              | VIAMSRAMNSG--               |               |                   |  |
| OsMYC7               | -----                                          | -AVGVKAM- | QDEVVLRVSTPLD | AHPISGFLSAMRD-       | SQLEVVASSMAVA | DDTVHTTLVV       | -----                                | RSAGPER-LTAE               | TVLAATSRGVMSAT              |               |                   |  |
| OsMYC4               | WAFEVGTRSMTCIIIVEDI                            | -----     | NPPROMLVN     | MDCKERS-IFLEIADQIRG- | GLDLILKGV     | MEVRKDKINARFAV   | -----                                | EANKDVT                    | RMIEFLSVHILEPSTG            |               |                   |  |
| OsMYC5               | KVGGGGGGGHRMEPQLEVRQVQGNEL                     | -----     | LVQVLWEH      | KPGGFVRMDAMNA        | -----         | GLQVTVNVNTSY     | NKLVLNVFRA                           | -----                      | MVRDSEVAVQADRVDRSLLEVTRYMYG |               |                   |  |
| OsMYC6               | VSGGGDAGREHHHVNVTVT                            | -----     | DKVVLLEVQCR   | WKELIMTQVFDATKS-     | LRLEVLVSQAST  | PDGLLGLKIQ       | -----                                | KFACSGS-VAPG               | MISEALQKATGG--              |               |                   |  |
| OsMYC7               | DDTDGERRRHCVSNVNVVMM                           | -----     | DNEVILEVQCR   | WKELIMTQVFDATKS-     | LRLEVLVSQAST  | PDGLLGLKIQ       | -----                                | KFASSAA-VEPG               | -----                       |               |                   |  |
| OsMYC72              | GGGDDGARCHAVEIEAKII                            | -----     | GDEAMIRVQCH   | KRNHPAAKIMTALRE-     | LDLVYHASVSVVK | DMIQQQVAV        | -----                                | KMASRVYSQDQ                | LNAAIYGRDAEPGT              |               |                   |  |
| AtMYC3               | SNQDSTASSIEMEIVDKII                            | -----     | GWDVMIRVQCH   | KRNHPAAKIMTALRE-     | LDLVNHNASLS   | VVNDLMIQQATV     | -----                                | KMGSOFFNH                  | QDLKVALTEKVGEC              |               |                   |  |
| AtMYC5               | VCKYEEKASEMMKIEVKIM                            | -----     | ESDDAMVRV     | ESRKDHHPGARIMNALMD   | -----         | LDLVNHNASLS      | VVNDLMIQQATV                         | -----                      | KMLRIYKQEL                  | LRDLMSKIS     |                   |  |
| AtMYC4               | CLNQESSVLIEMEIVDKII                            | -----     | GWDVMIRVQCH   | KRNHPAAKIMTALRE-     | LDLVNHNASLS   | VVNDLMIQQATV     | -----                                | KMGNOFFTQ                  | DLKVALTEKVGEC               |               |                   |  |
| AtEGL3               | EPADIGYAGLTDLNIRHSL                            | -----     | GNEVVIEVRC    | AWREGILLETMDVISD     | -----         | LNDDSHSVQ        | SSDGDGLCLTVNC                        | -----                      | KHKGTKI-ATTG                | MIQEAQORVAWIC |                   |  |
| AMS                  | DLENSNDKGQEMEPQVQVQDLGRFFVVKVIEYKPGGFTRLEAIDS  | -----     | LGLEVNANT     | RYLSIVSNVFKV         | -----         | -----            | -----                                | EKNDNEMVQ                  | AEHVRNLSLEITRNTSR           |               |                   |  |
| AtTT8                | -----                                          | -KTSEEVE  | SVSTII        | -----                | ENDVLEVMRC    | BYRGLLILQVLE     | HE                                   | -----                      | KVRGKKA                     | -----         | SIAEVKRAHQVHLHDTN |  |
| AtMYC2               | SSSCSSIKFPVGMIEIVDKII                          | -----     | GWDVMIRVQCH   | KRNHPAAKIMTALRE-     | LDLVNHNASLS   | VVNDLMIQQATV     | -----                                | KMGFRIYTQ                  | DLKVALTEKVGEC               |               |                   |  |
| AtMYC1               | ETEQTVTFVRDKTHLRVKEK                           | -----     | ETEVEVIEVRC   | SYRQYIVADIMETLSN     | -----         | LNDDAFSVRS       | HTLNKFLTLNLKA                        | -----                      | KFRGAHV-ASVGM               | IKREARRVIGDLF |                   |  |
| L-Myc Homo sapiens   | -----                                          | -----     | -----         | LRCRQQQ              | -----         | -----            | LOKRIAYLTGY                          | -----                      | -----                       |               |                   |  |
| myc Homo sapiens     | -----                                          | -----     | -----         | LRKRREQ              | -----         | -----            | LKHKEQLRNSCA                         | -----                      | -----                       |               |                   |  |
| L-myc-2 Homo sapiens | -----                                          | -----     | -----         | LRCRQQQ              | -----         | -----            | LOKRIAYLSSY                          | -----                      | -----                       |               |                   |  |
| N-myc Homo sapiens   | -----                                          | -----     | -----         | LRARQQQ              | -----         | -----            | LKKKEBHARTC                          | -----                      | -----                       |               |                   |  |
| myc Bos taurus       | -----                                          | -----     | -----         | LOKRREQ              | -----         | -----            | LKHKEQLRNSCA                         | -----                      | -----                       |               |                   |  |
| L-Myc Bos taurus     | -----                                          | -----     | -----         | LRCRQQQ              | -----         | -----            | LOKRIAYLSGY                          | -----                      | -----                       |               |                   |  |
| N-myc Mus musculus   | -----                                          | -----     | -----         | LRARQQQ              | -----         | -----            | LKKKEBHARTC                          | -----                      | -----                       |               |                   |  |
| c-myc Mus musculus   | -----                                          | -----     | -----         | LRKRREQ              | -----         | -----            | LKHKEQLRNSCA                         | -----                      | -----                       |               |                   |  |
| L-myc Mus musculus   | -----                                          | -----     | -----         | LRCRQQQ              | -----         | -----            | LOKRIAYLSGY                          | -----                      | -----                       |               |                   |  |
| s-myc Mus musculus   | -----                                          | -----     | -----         | LRARQQQ              | -----         | -----            | LKKKEBHARTC                          | -----                      | -----                       |               |                   |  |
| L-Myc Sus scrofa     | -----                                          | -----     | -----         | LRARQQQ              | -----         | -----            | LKKKEBHARTC                          | -----                      | -----                       |               |                   |  |
| n-Myc Sus scrofa     | -----                                          | -----     | -----         | LRKRREQ              | -----         | -----            | LKHKEQLRNSCA                         | -----                      | -----                       |               |                   |  |
| N-Myc Sus scrofa     | -----                                          | -----     | -----         | LRARQQQ              | -----         | -----            | LKKKEBHARTC                          | -----                      | -----                       |               |                   |  |

|                      | 1220                                                            | 1230  | 1240  | 1250  | 1260  | 1270  |
|----------------------|-----------------------------------------------------------------|-------|-------|-------|-------|-------|
| TaMYC8A              | .....                                                           | ..... | ..... | ..... | ..... | ..... |
| TaMYC9A              | PSP-----                                                        | ----- | ----- | ----- | ----- | ----- |
| TaMYC9B              | PSP-----                                                        | ----- | ----- | ----- | ----- | ----- |
| TaMYC10A             | -----                                                           | ----- | ----- | ----- | ----- | ----- |
| TaMYC10B             | -----                                                           | ----- | ----- | ----- | ----- | ----- |
| TaMYC10D             | -----                                                           | ----- | ----- | ----- | ----- | ----- |
| TaMYC9D              | PSP-----                                                        | ----- | ----- | ----- | ----- | ----- |
| TaMYC8D              | -----                                                           | ----- | ----- | ----- | ----- | ----- |
| TaMYC3D              | AMQIR-----                                                      | ----- | ----- | ----- | ----- | ----- |
| TaMYC3B              | AMQIR-----                                                      | ----- | ----- | ----- | ----- | ----- |
| TaMYC12B             | -----                                                           | ----- | ----- | ----- | ----- | ----- |
| TaMYC5B              | -----                                                           | ----- | ----- | ----- | ----- | ----- |
| TaMYC5D              | -----                                                           | ----- | ----- | ----- | ----- | ----- |
| TaMYC4A              | -----                                                           | ----- | ----- | ----- | ----- | ----- |
| TaMYC2B              | -----                                                           | ----- | ----- | ----- | ----- | ----- |
| TaMYC3A              | AMQIR-----                                                      | ----- | ----- | ----- | ----- | ----- |
| TaMYC4D              | -----                                                           | ----- | ----- | ----- | ----- | ----- |
| TaMYC7D              | N-----                                                          | ----- | ----- | ----- | ----- | ----- |
| TaMYC4B              | -----                                                           | ----- | ----- | ----- | ----- | ----- |
| TaMYC11D             | -----                                                           | ----- | ----- | ----- | ----- | ----- |
| TaMYC1               | -----                                                           | ----- | ----- | ----- | ----- | ----- |
| TaMYC2A              | -----                                                           | ----- | ----- | ----- | ----- | ----- |
| TaMYC8B              | -----                                                           | ----- | ----- | ----- | ----- | ----- |
| TaMYC6D              | -----                                                           | ----- | ----- | ----- | ----- | ----- |
| TaMYC7B              | N-----                                                          | ----- | ----- | ----- | ----- | ----- |
| TaMYC7A              | -----                                                           | ----- | ----- | ----- | ----- | ----- |
| BdMYC1               | -----                                                           | ----- | ----- | ----- | ----- | ----- |
| BdMYC2               | -----                                                           | ----- | ----- | ----- | ----- | ----- |
| BdMYC3               | -----                                                           | ----- | ----- | ----- | ----- | ----- |
| BdMYC4               | -----                                                           | ----- | ----- | ----- | ----- | ----- |
| BdMYC5               | PSP-----                                                        | ----- | ----- | ----- | ----- | ----- |
| BdMYC6               | AGGVWPAAMAPLPAMEAPMMVMAAEAKLDGGGEAGEHHYQLQQQQLLGGYHQQQLLYYLGLD  |       |       |       |       |       |
| BdMYC7               | PVPIR-----                                                      | ----- | ----- | ----- | ----- | ----- |
| OsMYC1               | -----                                                           | ----- | ----- | ----- | ----- | ----- |
| OsMYC7               | SP-----                                                         | ----- | ----- | ----- | ----- | ----- |
| OsMYC4               | SSILSAGVENTSLPRDSFFPSSIIPASGFSNCL-----                          |       |       |       |       |       |
| OsMYC5               | GVWPSPQEEEDDAKFDDGGDGGQAAAAAAGGGEHYHDEVGGGYHOHLHYLAFD-----      |       |       |       |       |       |
| OsMYC6               | -----                                                           | ----- | ----- | ----- | ----- | ----- |
| OsMYC7               | -----                                                           | ----- | ----- | ----- | ----- | ----- |
| OsMYC72              | AAR-----                                                        | ----- | ----- | ----- | ----- | ----- |
| AtMYC3               | -----                                                           | ----- | ----- | ----- | ----- | ----- |
| AtMYC5               | -----                                                           | ----- | ----- | ----- | ----- | ----- |
| AtMYC4               | -----                                                           | ----- | ----- | ----- | ----- | ----- |
| AtEGL3               | -----                                                           | ----- | ----- | ----- | ----- | ----- |
| AMS                  | GWQDDQMATGSMQNEKNEVDYQHYYDDHQHHNGHHHPFDHQMNQSAHHHHHHQHINHYHNQ-- |       |       |       |       |       |
| AtTT8                | L-----                                                          | ----- | ----- | ----- | ----- | ----- |
| AtMYC2               | -----                                                           | ----- | ----- | ----- | ----- | ----- |
| AtMYC1               | -----                                                           | ----- | ----- | ----- | ----- | ----- |
| L-Myc Homo sapiens   | -----                                                           | ----- | ----- | ----- | ----- | ----- |
| myc Homo sapiens     | -----                                                           | ----- | ----- | ----- | ----- | ----- |
| L-myc-2 Homo sapiens | -----                                                           | ----- | ----- | ----- | ----- | ----- |
| N-myc Homo sapiens   | -----                                                           | ----- | ----- | ----- | ----- | ----- |
| myc Bos taurus       | -----                                                           | ----- | ----- | ----- | ----- | ----- |
| L-Myc Bos taurus     | -----                                                           | ----- | ----- | ----- | ----- | ----- |
| N-myc Mus musculus   | -----                                                           | ----- | ----- | ----- | ----- | ----- |
| c-myc Mus musculus   | -----                                                           | ----- | ----- | ----- | ----- | ----- |
| L-myc Mus musculus   | -----                                                           | ----- | ----- | ----- | ----- | ----- |
| s-myc Mus musculus   | -----                                                           | ----- | ----- | ----- | ----- | ----- |
| L-Myc Sus scrofa     | -----                                                           | ----- | ----- | ----- | ----- | ----- |
| n-Myc Sus scrofa     | -----                                                           | ----- | ----- | ----- | ----- | ----- |
| N-Myc Sus scrofa     | -----                                                           | ----- | ----- | ----- | ----- | ----- |
