# Supplementary figures and images for: Characteristics and Expression Pattern of MYC Genes in Triticum aestivum, Oryza sativa, and Brachypodium distachyon
Source: MDPI journal article supplement (doi:10.3390/plants8080274), 2019-08-08

Figure S2: The bHLH domain and leucine zipper domain were identified in the MYC proteins

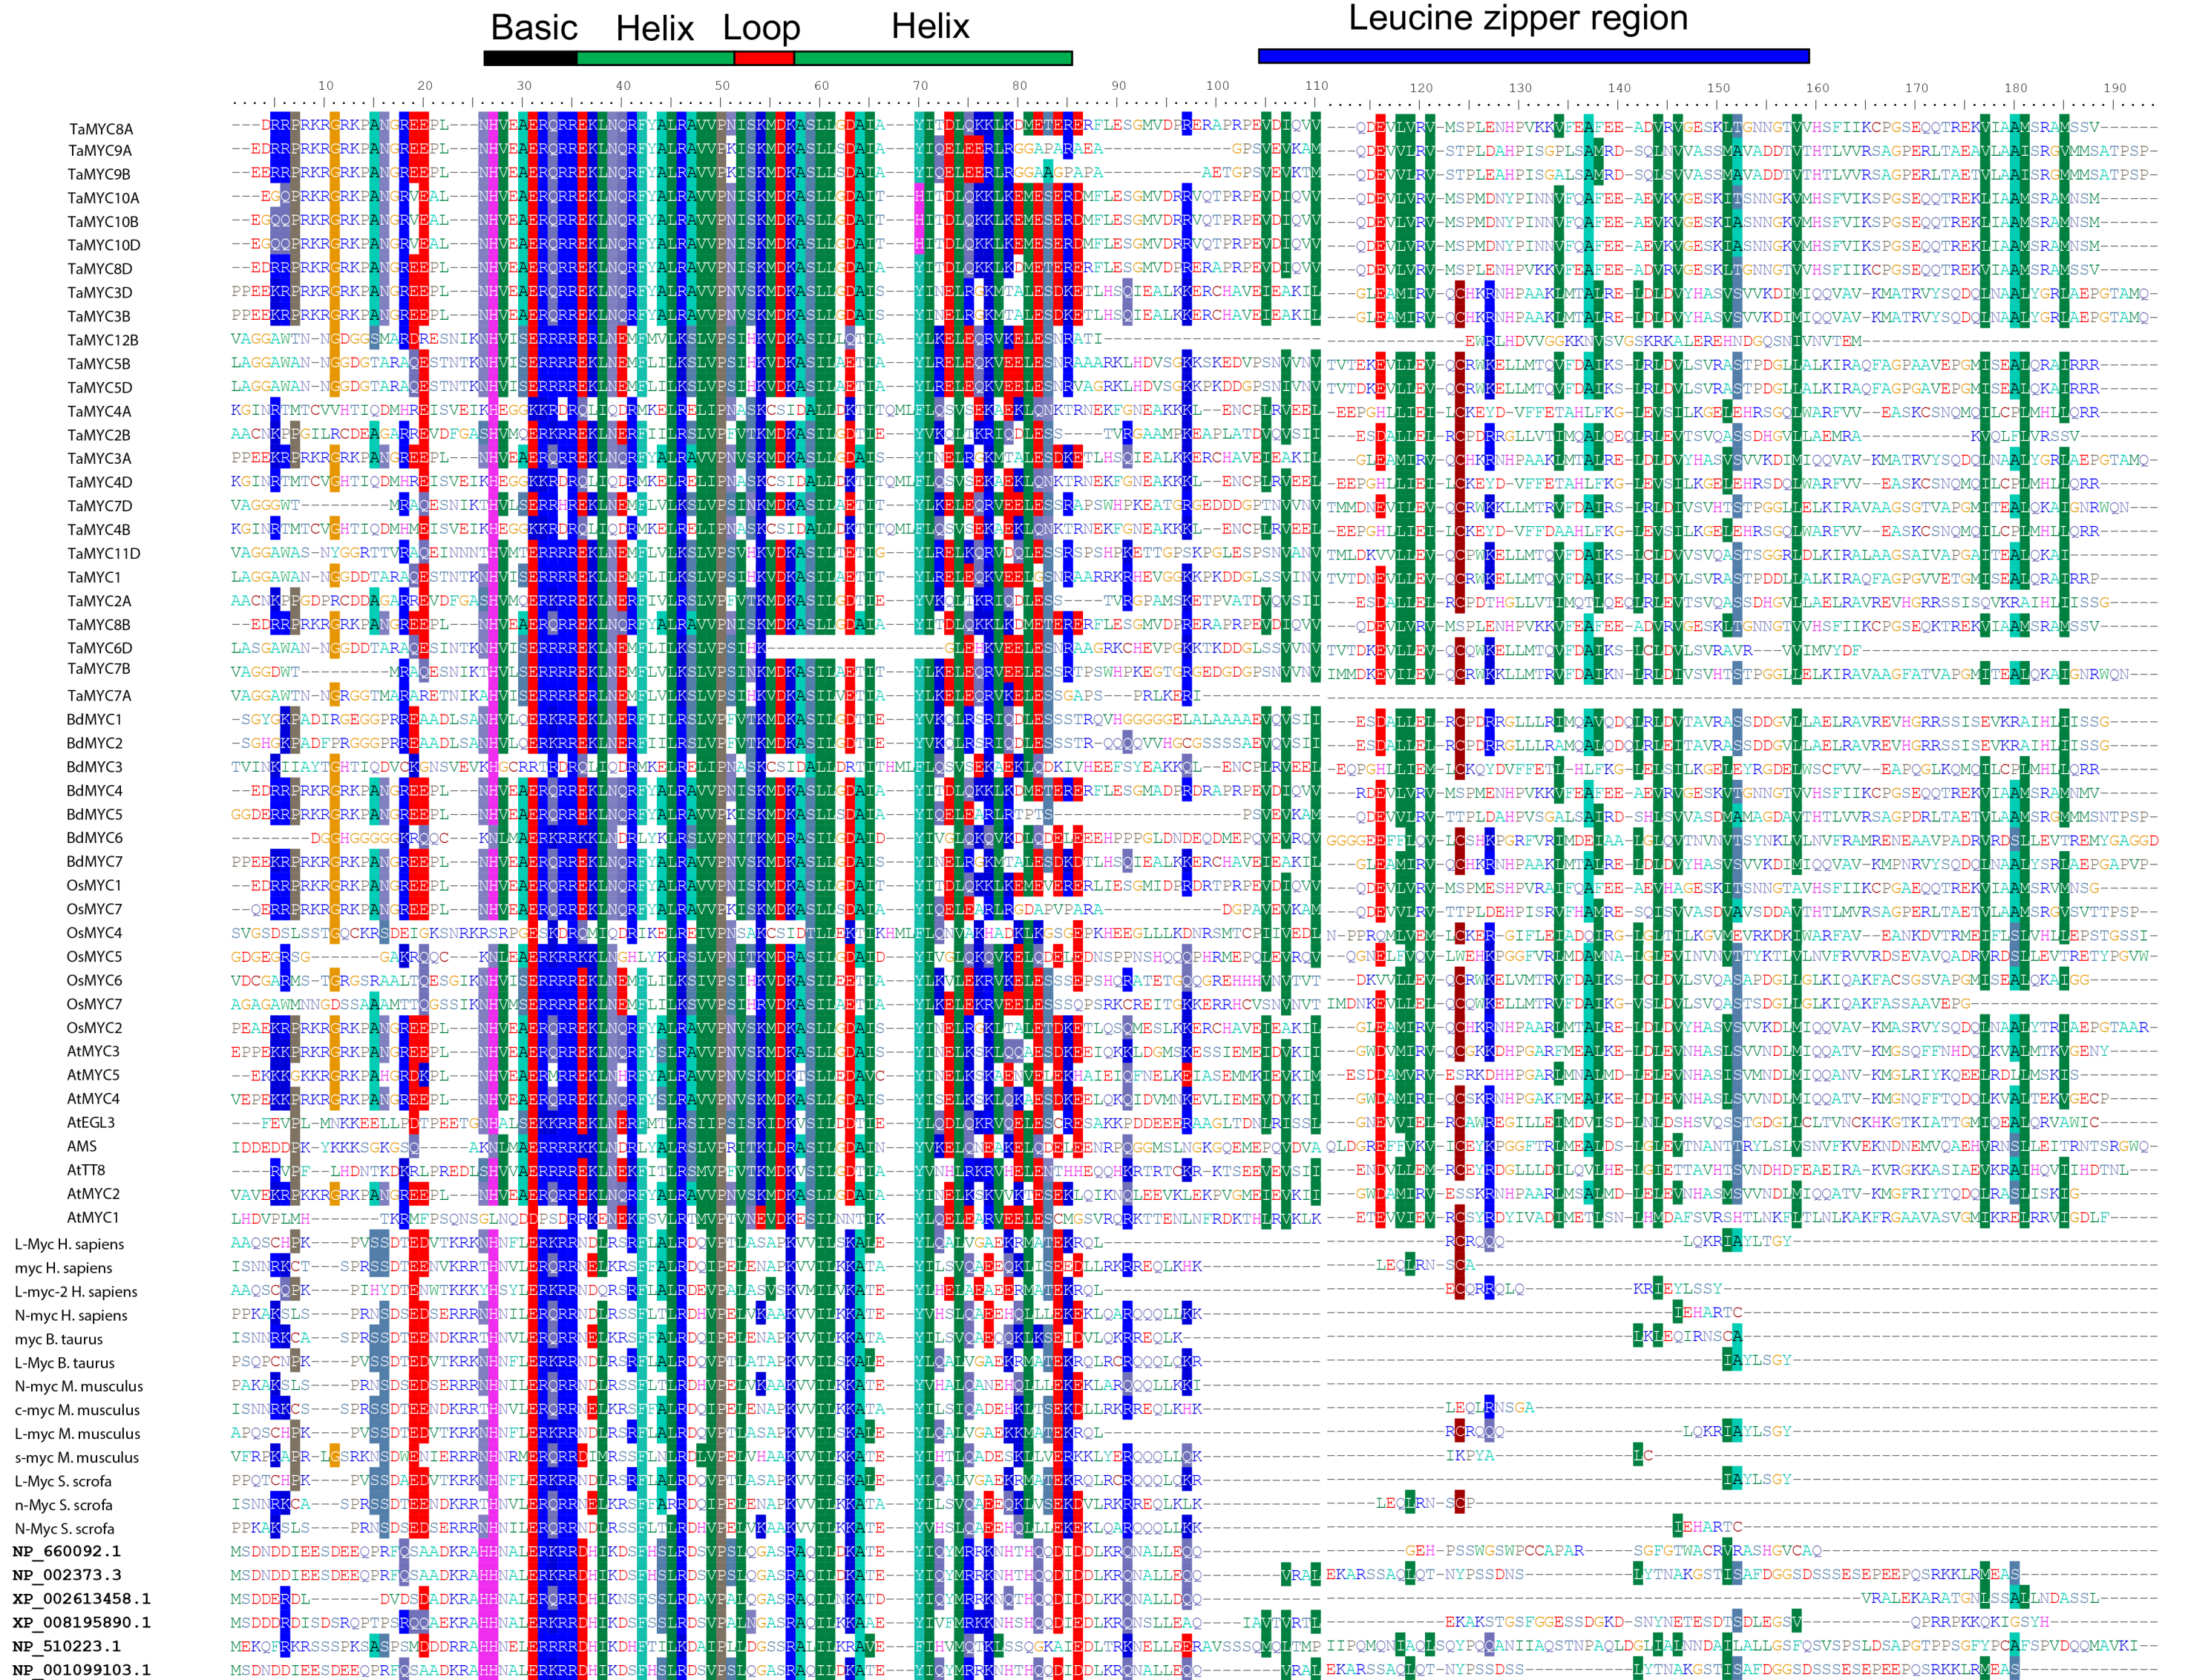

Supplement: s1 [file s1]
